# Supplementary material for: Integration of GWAS and RNA-Seq Analysis to Identify SNPs and Candidate Genes Associated with Alkali Stress Tolerance at the Germination Stage in Mung Bean
Source: MDPI journal article supplement (doi:10.3390/genes14061294), 2023-06-19
Supplement: s1 [file s1]

**Table S3.** Phenotypic variation of GR and GI of the 277 mungbean accessions under control and alkali stress environments.

|               |               | GR      | GI    |
|---------------|---------------|---------|-------|
| Control       | Min           | 32.00%  | 3.39  |
|               | Median        | 98.70%  | 21.67 |
|               | Max           | 100.00% | 25.00 |
|               | Mean          | 95.16%  | 20.74 |
|               | <i>SD</i>     | 0.08    | 3.61  |
|               | Kurtosis      | -3.35   | -1.43 |
|               | Skewness      | 16.16   | 2.48  |
|               | <i>CV</i> (%) | 8.60    | 17.41 |
|               | Min           | 0.00%   | 0.00  |
| Alkali stress | Median        | 30.70%  | 5.42  |
|               | Max           | 93.33%  | 19.33 |
|               | Mean          | 33.52%  | 6.15  |
|               | <i>SD</i>     | 0.23    | 4.31  |
|               | Skewness      | 0.45    | 0.70  |
|               | Kurtosis      | -0.82   | -0.33 |
|               | <i>CV</i> (%) | 67.96   | 70.10 |

GR: Germination rate; GI: Germination index; Min: minimum; Max: maximum; *SD*: standard deviation; *CV*: coefficient of variation.
