# Supplementary material for: Integration of GWAS and RNA-Seq Analysis to Identify SNPs and Candidate Genes Associated with Alkali Stress Tolerance at the Germination Stage in Mung Bean
Source: MDPI journal article supplement (doi:10.3390/genes14061294), 2023-06-19
Supplement: s1 [file s1]

**Table S5.** Statistics of sequencing data quality by RNA-seq.

| <b>Samples</b> | <b>Raw reads</b> | <b>Clean reads</b> | <b>Q20(%)</b> | <b>Q30(%)</b> | <b>GC content(%)</b> | <b>Total mapped reads</b> | <b>unique mapped reads</b> | <b>multiple mapped reads</b> |
|----------------|------------------|--------------------|---------------|---------------|----------------------|---------------------------|----------------------------|------------------------------|
| TM1            | 42319120         | 40882408           | 97.55         | 93.11         | 44.85                | 39100599(95.64%)          | 38164915(93.35%)           | 935684(2.29%)                |
| TM2            | 46418080         | 45572948           | 97.52         | 93.08         | 44.71                | 43990375(96.53%)          | 42949968(94.24%)           | 1040407(2.28%)               |
| TM3            | 45178936         | 44217212           | 97.67         | 93.42         | 44.50                | 42750591(96.68%)          | 41693422(94.29%)           | 1057169(2.39%)               |
| TMT1           | 46634424         | 45953878           | 97.62         | 93.25         | 44.21                | 44376133(96.57%)          | 43352859(94.34%)           | 1023274(2.23%)               |
| TMT2           | 42090322         | 40133988           | 97.65         | 93.43         | 45.11                | 38171509(95.11%)          | 37342806(93.05%)           | 828703(2.06%)                |
| TMT3           | 44671390         | 42794062           | 97.73         | 93.56         | 44.77                | 40614789(94.91%)          | 39759979(92.91%)           | 854810(2.0%)                 |
