# Supplementary material for: Integration of GWAS and RNA-Seq Analysis to Identify SNPs and Candidate Genes Associated with Alkali Stress Tolerance at the Germination Stage in Mung Bean
Source: MDPI journal article supplement (doi:10.3390/genes14061294), 2023-06-19
Supplement: s1 [file s1]

**Table S2.** The primer sequences used for qRT-PCR.

| <b>Gene</b>    | <b>Forward primer (5'-3')</b> | <b>Reverse primer (5'-3')</b> |
|----------------|-------------------------------|-------------------------------|
| <i>jg5712</i>  | CCACGGCCTGCTTTTCAAAA          | TGGACGTGCTGCAGGAATAA          |
| <i>jg6225</i>  | GTTTGGTGGTGGCACTGTTG          | GGCAACCACCAAGTTTGTGT          |
| <i>jg7597</i>  | CCAAAGTTTCCGGTTTCAA           | ACCAATGGTTCAGGAAACGA          |
| <i>jg7600</i>  | CATCTTCAGCAGTGGGAGCA          | AGAAGCAAGGGTGAAGGGTG          |
| <i>jg7622</i>  | TTGCGAGAACCTGGCGAATA          | CAACACCGGAAATCGTCCCT          |
| <i>jg12912</i> | TCATGGACTGTTGGAGGTGC          | AAACTTTAGCCTGGGGTCCG          |
| <i>jg19402</i> | CAAACCTCGCCCTCTCTCTGG         | TCTGTGGACCCTTGGATGAGA         |
| <i>jg19416</i> | CAAAAAGGCTGCTTCTGGTC          | AGGGAACACCAACAAATGGA          |
| <i>jg21301</i> | GTGGTTCAGGAGGCAATGGA          | GCACATTGGAAATCACGGGG          |
| <i>jg25807</i> | CAATGCCAAACACGCCAAGA          | GAACTCCAAGGCTTCGGTGA          |
| <i>jg25997</i> | GCAGTGGACGAAGCTAACCT          | TGCCAAAACGTAACCCTCGA          |
| <i>jg30941</i> | CAGACCCATCAGTGCCCTAC          | CATGGAAGGGTTGGTGGTGA          |
| <i>jg31682</i> | GGAGGAGGAACATCAAAAGGGT        | CAGTAGCTGGCTTCTCGTATCA        |
| <i>jg32966</i> | ATTTGCCCTTACTGCGGTGA          | GAACCAGACCTCCCAATCCG          |
| <i>VrActin</i> | GGCATCCACGAGACAACA            | AGCCTCCAATCCAGACAC            |
