# Supplementary material for: Integration of GWAS and RNA-Seq Analysis to Identify SNPs and Candidate Genes Associated with Alkali Stress Tolerance at the Germination Stage in Mung Bean
Source: MDPI journal article supplement (doi:10.3390/genes14061294), 2023-06-19
Supplement: s1 [file s1]

**Table S1.** List of mungbean accessions used in this study.

| Code | Sequencing No. | Accession name      | Province in China |
|------|----------------|---------------------|-------------------|
| 1    | Jl1            | Gong lv 2           | Jilin             |
| 2    | Jl2            | Gong lv 4           | Jilin             |
| 3    | Jl3            | Ji lin lv 7         | Jilin             |
| 4    | Jl4            | Ji lin lv 8         | Jilin             |
| 5    | Jl5            | Ji lin lv 9         | Jilin             |
| 6    | Jl6            | Ji lin lv 10        | Jilin             |
| 7    | Jl7            | Tao lv 218          | Jilin             |
| 8    | Jl8            | Tao lv 3            | Jilin             |
| 9    | Jl9            | Tao lv 5            | Jilin             |
| 10   | Jl10           | L4374               | Jilin             |
| 11   | Jl11           | 2088                | Jilin             |
| 12   | Hn1            | He nan hei lv dou   | Henan             |
| 13   | Hb1            | Bao 956-6           | Hebei             |
| 14   | Sd1            | Wei 8901-32         | Shandong          |
| 15   | Bjjz1          | Ming lv 1           | Beijing           |
| 16   | Img1           | C0655               | Inner Mongolia    |
| 17   | Bjjz2          | XLD2                | Beijing           |
| 18   | Bjjz3          | XLD9                | Beijing           |
| 19   | Bjjz4          | XLD8                | Beijing           |
| 20   | Hb2            | Ji lv 2             | Hebei             |
| 21   | Bjjz5          | XLD4                | Beijing           |
| 22   | Sd2            | C1147               | Shandong          |
| 23   | Bj1            | Zhong lv 2          | Beijing           |
| 24   | Sd3            | C1013               | Shandong          |
| 25   | Bjjz6          | BLS98051            | Beijing           |
| 26   | Bjjz7          | XLD5                | Beijing           |
| 27   | Bjjz8          | XLD3                | Beijing           |
| 28   | Bjjz9          | XLD6                | Beijing           |
| 29   | Bjjz10         | XLD1                | Beijing           |
| 30   | Hb3            | Ji lv 7             | Hebei             |
| 31   | Img2           | Qing shui he lv dou | Inner Mongolia    |
| 32   | Sd4            | Wei 9002-341        | Shandong          |
| 33   | Hb4            | Bao 942-40-2        | Hebei             |
| 34   | Img3           | C0595               | Inner Mongolia    |
| 35   | Bjjz11         | BL93478-2           | Beijing           |
| 36   | Hb5            | Ji lv 8             | Hebei             |
| 37   | Hub1           | E lv 3              | Hubei             |
| 38   | Hub2           | E lv 4              | Hubei             |
| 39   | Hlj1           | Lv feng 2           | Heilongjiang      |
| 40   | Hlj2           | Lv feng 5           | Heilongjiang      |
| 41   | Hb6            | Zhang lv 3          | Hebei             |
| 42   | Gx1            | Gui lv dou L74      | Guangxi           |
| 43   | Sx1            | Jin lv dou 6        | Shanxi            |
| 44   | Sx2            | Jin lv dou 7        | Shanxi            |
| 45   | Sx3            | Jin lv dou 8        | Shanxi            |
| 46   | Sx4            | Hei zhen zhu        | Shanxi            |
| 47   | Sd5            | Wei lv 5            | Shandong          |
| 48   | Sd6            | Wei lv 9            | Shandong          |
| 49   | Cq1            | Yu hei lv 3         | Chongqing         |
| 50   | Cq2            | Yu hei lv 4         | Chongqing         |

|     |      |                              |                |
|-----|------|------------------------------|----------------|
| 51  | Hb7  | 0816 mao-3                   | Hebei          |
| 52  | Hb8  | 0506 fan hei-1-5-2-1         | Hebei          |
| 53  | Hb9  | HN0904-2-1-1-1               | Hebei          |
| 54  | Hb10 | 0918-5-4-1-1                 | Hebei          |
| 55  | Hb11 | 518                          | Hebei          |
| 56  | Hb12 | 0616-4                       | Hebei          |
| 57  | Js1  | Su lv 3                      | Jiangsu        |
| 58  | Js2  | Su lv 4                      | Jiangsu        |
| 59  | Js3  | Su lv 5                      | Jiangsu        |
| 60  | Js4  | Su lv 6                      | Jiangsu        |
| 61  | Js5  | Su lv L13013                 | Jiangsu        |
| 62  | Sx5  | Da tong xiao ming lv dou     | Shanxi         |
| 63  | Sx6  | Jin lv dou 9                 | Shanxi         |
| 64  | Bj2  | Zhong lv 4                   | Beijing        |
| 65  | Bj3  | Zhong lv 5                   | Beijing        |
| 66  | Bj4  | Zhong lv 6                   | Beijing        |
| 67  | Bj5  | Zhong lv 7                   | Beijing        |
| 68  | Bj6  | Zhong lv 9                   | Beijing        |
| 69  | Bj7  | Zhong lv 10                  | Beijing        |
| 70  | Hb13 | Bao 942                      | Hebei          |
| 71  | Hb14 | Zhang jia kou ying ge lv dou | Hebei          |
| 72  | Sx7  | Jin lv dou 3                 | Shanxi         |
| 73  | Img4 | Nei meng gu lv dou           | Inner Mongolia |
| 74  | Sd7  | Wei lv 7                     | Shandong       |
| 75  | Sd8  | Wei lv 8                     | Shandong       |
| 76  | Ln1  | Liao lv 8                    | Liaoning       |
| 77  | Hlj3 | Lv feng 3                    | Heilongjiang   |
| 78  | Jl12 | Ji lin 3                     | Jilin          |
| 79  | Jl13 | Bai lv 6                     | Jilin          |
| 80  | Jl14 | Bai lv 8                     | Jilin          |
| 81  | Bj8  | Zhong lv 11                  | Beijing        |
| 82  | Hb15 | Ji lv 9                      | Hebei          |
| 83  | Bj9  | Zhong lv 8                   | Beijing        |
| 84  | Js6  | Su lv 2                      | Jiangsu        |
| 85  | Jl15 | Ji lin lv 5                  | Jilin          |
| 86  | Bj10 | Zhong lv 14                  | Beijing        |
| 87  | Img5 | Ke lv 1                      | Inner Mongolia |
| 88  | Ln2  | Liao lv 10                   | Liaoning       |
| 89  | Hb16 | Ji lv 11                     | Hebei          |
| 90  | Jl16 | Ji lin lv 6                  | Jilin          |
| 91  | Bj11 | Zhong lv 12                  | Beijing        |
| 92  | Jl17 | Bai lv 11                    | Jilin          |
| 93  | Hb17 | Ji lv 10                     | Hebei          |
| 94  | Hlj4 | Nen lv 2                     | Heilongjiang   |
| 95  | Bj12 | Pin lv 2011-06               | Beijing        |
| 96  | Bj13 | Pin lv 2011-12               | Beijing        |
| 97  | Hb18 | Ji lv 0816                   | Hebei          |
| 98  | Hb19 | Ji lv HN20810                | Hebei          |
| 99  | Js7  | Su lv 16-10                  | Jiangsu        |
| 100 | Js8  | Su lv 15-11                  | Jiangsu        |
| 101 | Hub3 | E lv 5                       | Hubei          |
| 102 | Sx8  | 1009-2-5                     | Shanxi         |

|     |      |                   |                |
|-----|------|-------------------|----------------|
| 103 | Jl18 | Bai lv 10         | Jilin          |
| 104 | Sx9  | Tong 1188326      | Shanxi         |
| 105 | Ln3  | Liao lv 10L708-5  | Liaoning       |
| 106 | Hb20 | Bao lv 200810-1   | Hebei          |
| 107 | Hb21 | Bao lv 201012-7   | Hebei          |
| 108 | Img6 | Ke lv 2           | Inner Mongolia |
| 109 | Hlj5 | 142-139           | Heilongjiang   |
| 110 | Hlj6 | 122-225           | Heilongjiang   |
| 111 | Sd9  | Wei lv 11         | Shandong       |
| 112 | Sd10 | Wei lv 12         | Shandong       |
| 113 | HN2  | Wan lv 2          | Henan          |
| 114 | Cq3  | Yu lv 2           | Chongqing      |
| 115 | Sd11 | Wei lv 05-8       | Shandong       |
| 116 | Hb22 | Bao lv 200520     | Hebei          |
| 117 | Hb23 | Ji lv 0204        | Hebei          |
| 118 | Hb24 | Bao lv 200621     | Hebei          |
| 119 | Js9  | Su lv 12-5        | Jiangsu        |
| 120 | Hb25 | Bao lv 200644     | Hebei          |
| 121 | Hb26 | Ji lv 0514        | Hebei          |
| 122 | Sx10 | Jin 9908-34       | Shanxi         |
| 123 | Sd12 | Wei lv 50934      | Shandong       |
| 124 | Sd13 | Wei lv 52500      | Shandong       |
| 125 | Jl19 | Ji lin lv 11      | Jilin          |
| 126 | Hb27 | 0802-4-2-1-2-1    | Hebei          |
| 127 | Hb28 | HN1023-7-2        | Hebei          |
| 128 | Sx11 | Tong 11411        | Shanxi         |
| 129 | Jl20 | Bai lv 13         | Jilin          |
| 130 | Jl21 | Da ying ge lv 935 | Jilin          |
| 131 | Ln4  | Liao lv p13-02    | Liaoning       |
| 132 | Ln5  | Liao lv 10L701    | Liaoning       |
| 133 | Hb29 | Zhang lv 2        | Hebei          |
| 134 | Js10 | Su lv 19-013      | Jiangsu        |
| 135 | Js11 | Su lv 19-118      | Jiangsu        |
| 136 | HN3  | Wan lv 5          | Henan          |
| 137 | HN4  | Wan lv 6          | Henan          |
| 138 | Hlj7 | 132-346           | Heilongjiang   |
| 139 | Hlj8 | 112-285           | Heilongjiang   |
| 140 | Cq4  | Yu lv 9           | Chongqing      |
| 141 | Bj14 | Pin lv 2014-129   | Beijing        |
| 142 | Bj15 | Pin lv 2014-124   | Beijing        |
| 143 | Hb30 | Ji lv 13          | Hebei          |
| 144 | Bj16 | LD036             | Beijing        |
| 145 | Bj17 | LD041             | Beijing        |
| 146 | Bj18 | LD042             | Beijing        |
| 147 | Bj19 | LD091             | Beijing        |
| 148 | Tj1  | Nong jia 13       | Tianjin        |
| 149 | Tj2  | Nong jia 19       | Tianjin        |
| 150 | Bj20 | LD031             | Beijing        |
| 151 | Hb31 | Huang se ji dou   | Hebei          |
| 152 | Hb32 | Tang shan lv dou  | Hebei          |
| 153 | Sd14 | Yi du ming lv     | Shandong       |
| 154 | Hb33 | Xiang he lv dou   | Hebei          |

|     |      |                   |                |
|-----|------|-------------------|----------------|
| 155 | Sx12 | Da yang lv dou    | Shanxi         |
| 156 | Hb34 | Da huang lv dou   | Hebei          |
| 157 | Hb35 | Qi xia ming lv    | Hebei          |
| 158 | Hb36 | LD0135            | Hebei          |
| 159 | Hb37 | Lu shi lv dou     | Hebei          |
| 160 | Hb38 | Xiao li lv dou    | Hebei          |
| 161 | Jl22 | Chang jia lv dou  | Jilin          |
| 162 | Sx13 | Da lv dou         | Shanxi         |
| 163 | Sx14 | Er bo zao         | Shanxi         |
| 164 | Sx15 | Huang ge lv       | Shanxi         |
| 165 | Sx16 | Da yang lv dou    | Shanxi         |
| 166 | Sx17 | He nan hei lv dou | Shanxi         |
| 167 | Img8 | Tian shan ming lv | Inner Mongolia |
| 168 | Img7 | Chi feng lv dou   | Inner Mongolia |
| 169 | Jl23 | Ju yuan lv dou    | Jilin          |
| 170 | Jl24 | Xiao huang lv dou | Jilin          |
| 171 | Jl25 | Ji lv 9346        | Jilin          |
| 172 | Jl26 | Yu shu da lv dou  | Jilin          |
| 173 | Jl27 | Fei cui lv        | Jilin          |
| 174 | Ah1  | Wan ke lv 1       | Anhui          |
| 175 | Ah2  | Wan ke lv 2       | Anhui          |
| 176 | Ah3  | Wan ke lv 3       | Anhui          |
| 177 | Ah4  | Wan ke lv 4       | Anhui          |
| 178 | Ah5  | Wan ke lv 5       | Anhui          |
| 179 | Ah6  | Wan ke lv 6       | Anhui          |
| 180 | HN5  | Yu lv 2           | Henan          |
| 181 | HN6  | Yu lv 4           | Henan          |
| 182 | HN7  | Zheng 08-103-04   | Henan          |
| 183 | HN8  | Zhen 07-70        | Henan          |
| 184 | HN9  | Zhen hei lv 1     | Henan          |
| 185 | HN10 | Zheng lv 8        | Henan          |
| 186 | HN11 | Zheng lv 11       | Henan          |
| 187 | HN12 | Zheng lv 12       | Henan          |
| 188 | HN13 | Zheng lv 17       | Henan          |
| 189 | HN14 | Guo lv 3          | Henan          |
| 190 | HN15 | Q yi lv 1         | Henan          |
| 191 | HN16 | Q yi lv 2         | Henan          |
| 192 | HN17 | Wan lv 1          | Henan          |
| 193 | HN18 | An 07-3           | Henan          |
| 194 | HN19 | An lv 8           | Henan          |
| 195 | HN20 | An lv 10          | Henan          |
| 196 | HN21 | An lv 11          | Henan          |
| 197 | Ah7  | AHM1              | Anhui          |
| 198 | Ah8  | AHM2              | Anhui          |
| 199 | Ah9  | AHM3              | Anhui          |
| 200 | Ah10 | AHM4              | Anhui          |
| 201 | Ah11 | AHM5              | Anhui          |
| 202 | Ah12 | AHM6              | Anhui          |
| 203 | Ah13 | AHM7              | Anhui          |
| 204 | Ah14 | AHM8              | Anhui          |
| 205 | Ah15 | AHM9              | Anhui          |
| 206 | Ah16 | AHM10             | Anhui          |

|     |      |                  |          |
|-----|------|------------------|----------|
| 207 | Ah17 | AHM11            | Anhui    |
| 208 | Ah18 | AHM12            | Anhui    |
| 209 | Ah19 | AHM13            | Anhui    |
| 210 | Ah20 | AHM14            | Anhui    |
| 211 | Ah21 | AHM15            | Anhui    |
| 212 | Ah22 | AHM16            | Anhui    |
| 213 | Ah23 | AHM17            | Anhui    |
| 214 | Ah24 | AHM18            | Anhui    |
| 215 | Ah25 | AHM19            | Anhui    |
| 216 | Ah26 | AHM20            | Anhui    |
| 217 | HN22 | Yu lv 1          | Henan    |
| 218 | HN23 | Yu lv 3          | Henan    |
| 219 | HN24 | Yu lv 5          | Henan    |
| 220 | HN25 | Guo lv 1         | Henan    |
| 221 | HN26 | Guo lv 2         | Henan    |
| 222 | HN27 | An 9910          | Henan    |
| 223 | HN28 | Zheng 03-94      | Henan    |
| 224 | HN29 | Zheng lv 5       | Henan    |
| 225 | HN30 | Ru yang lv dou   | Henan    |
| 226 | HN31 | Wen xian lv dou  | Henan    |
| 227 | HN32 | Deng xian lv dou | Henan    |
| 228 | Tj3  | Nong jia 3       | Tianjin  |
| 229 | Tj4  | Nong jia 15      | Tianjin  |
| 230 | Tj5  | Nong jia 25      | Tianjin  |
| 231 | Tj6  | Nong jia 35      | Tianjin  |
| 232 | Bj21 | LD035            | Beijing  |
| 233 | Bj22 | LD043            | Beijing  |
| 234 | Bj23 | LD045            | Beijing  |
| 235 | Bj24 | LD051            | Beijing  |
| 236 | Jl28 | Gong jiao 1099   | Jilin    |
| 237 | Jl29 | 1123             | Jilin    |
| 238 | Jl30 | 2154             | Jilin    |
| 239 | Jl31 | 3563             | Jilin    |
| 240 | Jl32 | 3564             | Jilin    |
| 241 | Jl33 | 9283             | Jilin    |
| 242 | Sx18 | 84-22            | Shanxi   |
| 243 | Jl34 | r 68-27          | Jilin    |
| 244 | Jl35 | Lv dou 103       | Jilin    |
| 245 | Jl36 | Lv dou 109       | Jilin    |
| 246 | Jl37 | Lv dou 711       | Jilin    |
| 247 | Jl38 | Lv dou 716       | Jilin    |
| 248 | Jl39 | Lv dou 740       | Jilin    |
| 249 | Jl40 | Lv dou 822       | Jilin    |
| 250 | Jl41 | Lv dou 827       | Jilin    |
| 251 | Jl42 | Lv dou 833       | Jilin    |
| 252 | Jl43 | Lv dou 423       | Jilin    |
| 253 | HN33 | Zheng zhou 427   | Henan    |
| 254 | Ln6  | Lv dou 12        | Liaoning |
| 255 | Ln7  | Lv dou 74        | Liaoning |
| 256 | Ln8  | Lv dou 82        | Liaoning |
| 257 | Ln9  | Lv dou 85        | Liaoning |
| 258 | Ln10 | Lv nong 8        | Liaoning |

|     |       |                    |              |
|-----|-------|--------------------|--------------|
| 259 | Ln11  | Lv nong 9          | Liaoning     |
| 260 | Hub4  | E lv 1             | Hubei        |
| 261 | Js12  | Xu yin 1           | Jiangsu      |
| 262 | Hb39  | Ji yin 6           | Hebei        |
| 263 | Sx19  | Jin yin 1          | Shanxi       |
| 264 | Sx20  | Jin yin 2          | Shanxi       |
| 265 | Hlj9  | Long lv 1          | Heilongjiang |
| 266 | Hlj10 | Lv feng 1          | Heilongjiang |
| 267 | Sx21  | Yin D76            | Shanxi       |
| 268 | Jl44  | Lv dou (4)         | Jilin        |
| 269 | Jl45  | Lv dou (7)         | Jilin        |
| 270 | Jl46  | Lv dou 8           | Jilin        |
| 271 | Jl47  | Lv dou 7           | Jilin        |
| 272 | Jl48  | Tang lv            | Jilin        |
| 273 | Jl49  | Da li chang jia lv | Jilin        |
| 274 | Jl50  | Lv dou wang        | Jilin        |
| 275 | Jl51  | Ju jia lv dou      | Jilin        |
| 276 | Jl52  | Lv duo shou        | Jilin        |
| 277 | Jl53  | T 13               | Jilin        |

---
