# Supplementary material for: Integration of GWAS and RNA-Seq Analysis to Identify SNPs and Candidate Genes Associated with Alkali Stress Tolerance at the Germination Stage in Mung Bean
Source: MDPI journal article supplement (doi:10.3390/genes14061294), 2023-06-19
Supplement: s1 [file s1]

**Table S4.** The 691 candidate genes related to alkali stress detected by GWAS.

| Gene ID       | Traits   | Chr | Start   | End     | Pos     | Function description                                                                                     |
|---------------|----------|-----|---------|---------|---------|----------------------------------------------------------------------------------------------------------|
| <i>lg7594</i> | RGR, RGI | 3   | 1301765 | 1313414 | 1599285 | NA                                                                                                       |
| <i>lg7595</i> | RGR, RGI | 3   | 1318449 | 1319222 | 1599285 | NA                                                                                                       |
| <i>lg7596</i> | RGR, RGI | 3   | 1321253 | 1323070 | 1599285 | Stem-specific protein TSJT1 OS=Nicotiana tabacum GN=TSJT1 PE=2<br>SV=1                                   |
| <i>lg7597</i> | RGR, RGI | 3   | 1348370 | 1348943 | 1599285 | NA                                                                                                       |
| <i>lg7598</i> | RGR, RGI | 3   | 1356743 | 1356979 | 1599285 | NA                                                                                                       |
| <i>lg7599</i> | RGR, RGI | 3   | 1456193 | 1457060 | 1599285 | NA                                                                                                       |
| <i>lg7600</i> | RGR, RGI | 3   | 1458448 | 1461708 | 1599285 | CBS domain-containing protein CBSX5 OS=Arabidopsis thaliana<br>GN=CBSX5 PE=2 SV=2                        |
| <i>lg7601</i> | RGR, RGI | 3   | 1462262 | 1469980 | 1599285 | Ultraviolet-B receptor UVR8 OS=Arabidopsis thaliana GN=UVR8 PE=1<br>SV=1/                                |
| <i>lg7602</i> | RGR, RGI | 3   | 1485635 | 1975048 | 1599285 | NA                                                                                                       |
| <i>lg7603</i> | RGR, RGI | 3   | 1501168 | 1501500 | 1599285 | NA                                                                                                       |
| <i>lg7604</i> | RGR, RGI | 3   | 1512615 | 1512938 | 1599285 | NA                                                                                                       |
| <i>lg7605</i> | RGR, RGI | 3   | 1522130 | 1522852 | 1599285 | NA                                                                                                       |
| <i>lg7606</i> | RGR, RGI | 3   | 1527892 | 1544297 | 1599285 | Plant intracellular Ras-group-related LRR protein 6 OS=Oryza sativa<br>subsp. japonica GN=IRL6 PE=2 SV=1 |
| <i>lg7607</i> | RGR, RGI | 3   | 1572669 | 1578689 | 1599285 | Beta-glucosidase 18 OS=Oryza sativa subsp. japonica GN=BGLU18 PE=3<br>SV=2                               |
| <i>lg7608</i> | RGR, RGI | 3   | 1596146 | 1596562 | 1599285 | NA                                                                                                       |
| <i>lg7609</i> | RGR, RGI | 3   | 1617972 | 1624049 | 1599285 | NA                                                                                                       |
| <i>lg7610</i> | RGR, RGI | 3   | 1656020 | 1659670 | 1599285 | Probable inactive beta-glucosidase 14 OS=Oryza sativa subsp. japonica<br>GN=BGLU14 PE=2 SV=2             |
| <i>lg7611</i> | RGR, RGI | 3   | 1679892 | 1685244 | 1599285 | Nuclear/nucleolar GTPase 2 OS=Oryza sativa subsp. indica GN=NUG2<br>PE=3 SV=1                            |
| <i>lg7612</i> | RGR, RGI | 3   | 1696311 | 1697082 | 1599285 | NA                                                                                                       |
| <i>lg7613</i> | RGR, RGI | 3   | 1709781 | 1716099 | 1599285 | MLO-like protein 11 OS=Arabidopsis thaliana GN=MLO11 PE=2 SV=1                                           |
| <i>lg7614</i> | RGR, RGI | 3   | 1717130 | 1727467 | 1599285 | Choline transporter protein 1 OS=Arabidopsis thaliana GN=CHER1<br>PE=1 SV=1                              |
| <i>lg7615</i> | RGR, RGI | 3   | 1743009 | 1753274 | 1599285 | NA                                                                                                       |
| <i>lg7616</i> | RGR, RGI | 3   | 1761394 | 1761751 | 1599285 | NA                                                                                                       |
| <i>lg7617</i> | RGR, RGI | 3   | 1805491 | 1806500 | 1599285 | NA                                                                                                       |
| <i>lg7618</i> | RGR, RGI | 3   | 1822393 | 1829634 | 1599285 | NA                                                                                                       |

|                |          |   |          |          |          |                                                                                                |
|----------------|----------|---|----------|----------|----------|------------------------------------------------------------------------------------------------|
| <i>jg7619</i>  | RGR, RGI | 3 | 1833542  | 1838658  | 1599285  | NA                                                                                             |
| <i>jg7620</i>  | RGR, RGI | 3 | 1842854  | 1844739  | 1599285  | NA                                                                                             |
| <i>jg7621</i>  | RGR, RGI | 3 | 1844977  | 1845806  | 1599285  | NA                                                                                             |
| <i>jg7622</i>  | RGR, RGI | 3 | 1850269  | 1850998  | 1599285  | Defensin-like protein OS= <i>Vigna unguiculata</i> PE=3 SV=1                                   |
| <i>jg7623</i>  | RGR, RGI | 3 | 1863674  | 1864085  | 1599285  | NA                                                                                             |
| <i>jg7624</i>  | RGR, RGI | 3 | 1869149  | 1869573  | 1599285  | NA                                                                                             |
| <i>jg7625</i>  | RGR, RGI | 3 | 1883405  | 1887218  | 1599285  | Thioredoxin M4, chloroplastic OS= <i>Arabidopsis thaliana</i> GN=At3g15360<br>PE=2 SV=2        |
| <i>jg19402</i> | RGR, RGI | 6 | 39291070 | 39292427 | 39567121 | Protein EXORDIUM OS= <i>Arabidopsis thaliana</i> GN=EXO PE=2 SV=1                              |
| <i>jg19403</i> | RGR, RGI | 6 | 39313388 | 39313782 | 39567121 | NA                                                                                             |
| <i>jg19404</i> | RGR, RGI | 6 | 39330048 | 39331930 | 39567121 | Protein EXORDIUM OS= <i>Arabidopsis thaliana</i> GN=EXO PE=2 SV=1                              |
| <i>jg19405</i> | RGR, RGI | 6 | 39354947 | 39356216 | 39567121 | Protein EXORDIUM OS= <i>Arabidopsis thaliana</i> GN=EXO PE=2 SV=1                              |
| <i>jg19406</i> | RGR, RGI | 6 | 39362816 | 39363058 | 39567121 | NA                                                                                             |
| <i>jg19407</i> | RGR, RGI | 6 | 39381363 | 39388640 | 39567121 | NA                                                                                             |
| <i>jg19408</i> | RGR, RGI | 6 | 39408804 | 39411595 | 39567121 | NA                                                                                             |
| <i>jg19409</i> | RGR, RGI | 6 | 39424909 | 39425247 | 39567121 | NA                                                                                             |
| <i>jg19410</i> | RGR, RGI | 6 | 39428334 | 39428576 | 39567121 | NA                                                                                             |
| <i>jg19411</i> | RGR, RGI | 6 | 39429060 | 39431136 | 39567121 | NA                                                                                             |
| <i>jg19412</i> | RGR, RGI | 6 | 39435353 | 39435664 | 39567121 | NA                                                                                             |
| <i>jg19413</i> | RGR, RGI | 6 | 39448344 | 39448559 | 39567121 | NA                                                                                             |
| <i>jg19414</i> | RGR, RGI | 6 | 39451650 | 39453348 | 39567121 | NA                                                                                             |
| <i>jg19415</i> | RGR, RGI | 6 | 39460303 | 39461420 | 39567121 | NA                                                                                             |
| <i>jg19416</i> | RGR, RGI | 6 | 39462440 | 39466668 | 39567121 | 7-deoxyloganetin glucosyltransferase OS= <i>Gardenia jasmi</i> NAides<br>GN=UGT85A24 PE=1 SV=1 |
| <i>jg19417</i> | RGR, RGI | 6 | 39467031 | 39468566 | 39567121 | NA                                                                                             |
| <i>jg19418</i> | RGR, RGI | 6 | 39504014 | 39504424 | 39567121 | NA                                                                                             |
| <i>jg19419</i> | RGR, RGI | 6 | 39508240 | 39515411 | 39567121 | NA                                                                                             |
| <i>jg19420</i> | RGR, RGI | 6 | 39516209 | 39516619 | 39567121 | NA                                                                                             |
| <i>jg19421</i> | RGR, RGI | 6 | 39520455 | 39521433 | 39567121 | NA                                                                                             |
| <i>jg19422</i> | RGR, RGI | 6 | 39539534 | 39543348 | 39567121 | NA                                                                                             |
| <i>jg19423</i> | RGR, RGI | 6 | 39571220 | 39573535 | 39567121 | 7-deoxyloganetin glucosyltransferase OS= <i>Gardenia jasmi</i> NAides<br>GN=UGT85A24 PE=1 SV=1 |
| <i>jg19424</i> | RGR, RGI | 6 | 39579151 | 39580351 | 39567121 | NA                                                                                             |
| <i>jg19425</i> | RGR, RGI | 6 | 39586012 | 39588720 | 39567121 | NA                                                                                             |

|                |          |   |          |          |          |                                                                                          |
|----------------|----------|---|----------|----------|----------|------------------------------------------------------------------------------------------|
| <i>jg19426</i> | RGR, RGI | 6 | 39584978 | 39598683 | 39567121 | NA                                                                                       |
| <i>jg19427</i> | RGR, RGI | 6 | 39604956 | 39605654 | 39567121 | NA                                                                                       |
| <i>jg19428</i> | RGR, RGI | 6 | 39630335 | 39630903 | 39567121 | NA                                                                                       |
| <i>jg19429</i> | RGR, RGI | 6 | 39631206 | 39633471 | 39567121 | NA                                                                                       |
| <i>jg19430</i> | RGR, RGI | 6 | 39678304 | 39684577 | 39567121 | NA                                                                                       |
| <i>jg19431</i> | RGR, RGI | 6 | 39691238 | 39693320 | 39567121 | Putative RING-H2 finger protein ATL21B OS=Arabidopsis thaliana<br>GN=ATL21B PE=3 SV=1    |
| <i>jg19432</i> | RGR, RGI | 6 | 39707759 | 39712965 | 39567121 | NA                                                                                       |
| <i>jg19433</i> | RGR, RGI | 6 | 39719124 | 39719493 | 39567121 | NA                                                                                       |
| <i>jg19434</i> | RGR, RGI | 6 | 39745124 | 39747783 | 39567121 | NA                                                                                       |
| <i>jg19435</i> | RGR, RGI | 6 | 39752014 | 39753008 | 39567121 | NA                                                                                       |
| <i>jg19436</i> | RGR, RGI | 6 | 39767668 | 39768318 | 39567121 | NA                                                                                       |
| <i>jg19437</i> | RGR, RGI | 6 | 39779253 | 39785619 | 39567121 | NA                                                                                       |
| <i>jg19438</i> | RGR, RGI | 6 | 39783803 | 39791511 | 39567121 | Putative RING-H2 finger protein ATL21B OS=Arabidopsis thaliana<br>GN=ATL21B PE=3 SV=1    |
| <i>jg19439</i> | RGR, RGI | 6 | 39790045 | 39791511 | 39567121 | NA                                                                                       |
| <i>jg19440</i> | RGR, RGI | 6 | 39793762 | 39796938 | 39567121 | NA                                                                                       |
| <i>jg19441</i> | RGR, RGI | 6 | 39787253 | 39833171 | 39567121 | Rust resistance kinase Lr10 OS=Triticum aestivum GN=LRK10 PE=2<br>SV=1                   |
| <i>jg19442</i> | RGR, RGI | 6 | 39855390 | 39857574 | 39567121 | 7-deoxyloganetin glucosyltransferase OS=Gardenia jasmiNAides<br>GN=UGT85A24 PE=1 SV=1    |
| <i>jg19443</i> | RGR, RGI | 6 | 39860792 | 39862271 | 39567121 | Protein TRANSPARENT TESTA 1 OS=Arabidopsis thaliana GN=TT1<br>PE=1 SV=1                  |
| <i>jg25733</i> | RGR      | 7 | 71976300 | 71979834 | 72278080 | Protein PLASTID MOVEMENT IMPAIRED 1 OS=Arabidopsis thaliana<br>GN=PMI1 PE=1 SV=1         |
| <i>jg25734</i> | RGR      | 7 | 71980057 | 71983188 | 72278080 | NA                                                                                       |
| <i>jg25736</i> | RGR      | 7 | 71994188 | 71998417 | 72278080 | Sialyltransferase-like protein 2 OS=Arabidopsis thaliana GN=SIA2 PE=2<br>SV=1            |
| <i>jg25737</i> | RGR      | 7 | 72000810 | 72004642 | 72278080 | Pre-mRNA-splicing factor SPF27 homolog OS=Arabidopsis thaliana<br>GN=MOS4 PE=1 SV=1      |
| <i>jg25738</i> | RGR      | 7 | 72005350 | 72009853 | 72278080 | Peroxisome biogenesis protein 3-2 OS=Arabidopsis thaliana GN=PEX3-2<br>PE=2 SV=1         |
| <i>jg25739</i> | RGR      | 7 | 72011653 | 72013853 | 72278080 | Guanine nucleotide-binding protein subunit beta-like protein<br>OS=Glycine max PE=2 SV=1 |

|                |     |   |          |          |          |                                                                                                                |
|----------------|-----|---|----------|----------|----------|----------------------------------------------------------------------------------------------------------------|
| <i>ig25740</i> | RGR | 7 | 72017357 | 72022654 | 72278080 | Actin-interacting protein 1-2 OS=Arabidopsis thaliana GN=AIP1-2 PE=2 SV=1                                      |
| <i>ig25741</i> | RGR | 7 | 72026199 | 72029075 | 72278080 | Two-component response regulator ARR14 OS=Arabidopsis thaliana GN=ARR14 PE=1 SV=2                              |
| <i>ig25742</i> | RGR | 7 | 72032781 | 72034933 | 72278080 | Protein MOTHER of FT and TFL1 OS=Arabidopsis thaliana GN=MFT PE=1 SV=1                                         |
| <i>ig25743</i> | RGR | 7 | 72049946 | 72051983 | 72278080 | NA                                                                                                             |
| <i>ig25744</i> | RGR | 7 | 72066693 | 72069412 | 72278080 | Uncharacterized GPI-anchored protein At4g28100 OS=Arabidopsis thaliana GN=At4g28100 PE=1 SV=1                  |
| <i>ig25745</i> | RGR | 7 | 72071232 | 72072585 | 72278080 | Uncharacterized protein At5g39865 OS=Arabidopsis thaliana GN=At5g39865 PE=2 SV=1                               |
| <i>ig25746</i> | RGR | 7 | 72073833 | 72076533 | 72278080 | Pentatricopeptide repeat-containing protein At4g02750 OS=Arabidopsis thaliana GN=PCMP-H24 PE=3 SV=1            |
| <i>ig25747</i> | RGR | 7 | 72076796 | 72080382 | 72278080 | Pentatricopeptide repeat-containing protein At4g02750 OS=Arabidopsis thaliana GN=PCMP-H24 PE=3 SV=1            |
| <i>ig25748</i> | RGR | 7 | 72080681 | 72085787 | 72278080 | Mitogen-activated protein kinase 9 OS=Arabidopsis thaliana GN=MPK9 PE=2 SV=2                                   |
| <i>ig25749</i> | RGR | 7 | 72089669 | 72093250 | 72278080 | HMG-Y-related protein A OS=Zea mays GN=HMGIY2 PE=1 SV=1                                                        |
| <i>ig25750</i> | RGR | 7 | 72094036 | 72096557 | 72278080 | Probable arabiNAsyltransferase ARAD1 OS=Arabidopsis thaliana GN=ARAD1 PE=1 SV=1                                |
| <i>ig25751</i> | RGR | 7 | 72101461 | 72103266 | 72278080 | Probable serine/threonine-protein kinase SIS8 OS=Arabidopsis thaliana GN=SIS8 PE=1 SV=1                        |
| <i>ig25752</i> | RGR | 7 | 72101461 | 72110182 | 72278080 | Probable serine/threonine-protein kinase SIS8 OS=Arabidopsis thaliana GN=SIS8 PE=1 SV=1                        |
| <i>ig25753</i> | RGR | 7 | 72111096 | 72112777 | 72278080 | Peptidyl-prolyl cis-trans isomerase FKBP17-2, chloroplastic OS=Arabidopsis thaliana GN=FKBP17-2 PE=1 SV=1      |
| <i>ig25754</i> | RGR | 7 | 72114861 | 72119342 | 72278080 | Eukaryotic translation initiation factor 3 subunit C OS=Medicago truncatula GN=TIF3C1 PE=2 SV=1                |
| <i>ig25755</i> | RGR | 7 | 72121144 | 72125288 | 72278080 | NA                                                                                                             |
| <i>ig25756</i> | RGR | 7 | 72131995 | 72133983 | 72278080 | NA                                                                                                             |
| <i>ig25757</i> | RGR | 7 | 72134981 | 72136033 | 72278080 | NA                                                                                                             |
| <i>ig25758</i> | RGR | 7 | 72144568 | 72149876 | 72278080 | Pentatricopeptide repeat-containing protein At2g01390 OS=Arabidopsis thaliana GN=At2g01390/At2g01380 PE=2 SV=2 |
| <i>ig25759</i> | RGR | 7 | 72150360 | 72156723 | 72278080 | Golgin candidate 2 OS=Arabidopsis thaliana GN=GC2 PE=1 SV=1                                                    |

|                |     |   |          |          |          |                                                                                                                   |
|----------------|-----|---|----------|----------|----------|-------------------------------------------------------------------------------------------------------------------|
| <i>jg25760</i> | RGR | 7 | 72157448 | 72159781 | 72278080 | Ras-related protein RABA6a OS=Arabidopsis thaliana GN=RABA6A<br>PE=2 SV=1                                         |
| <i>jg25761</i> | RGR | 7 | 72162408 | 72163866 | 72278080 | Calcium-binding allergen Ole e 8 OS=Olea europaea PE=1 SV=1                                                       |
| <i>jg25762</i> | RGR | 7 | 72166533 | 72168617 | 72278080 | Thaumatococcus-like protein OS=Arabidopsis thaliana GN=At1g18250 PE=2<br>SV=2                                     |
| <i>jg25763</i> | RGR | 7 | 72172851 | 72176026 | 72278080 | WUSCHEL-related homeobox 1 OS=Arabidopsis thaliana GN=WOX1<br>PE=2 SV=2                                           |
| <i>jg25764</i> | RGR | 7 | 72179790 | 72182717 | 72278080 | Pentatricopeptide repeat-containing protein At2g01390 OS=Arabidopsis<br>thaliana GN=At2g01390/At2g01380 PE=2 SV=2 |
| <i>jg25765</i> | RGR | 7 | 72183687 | 72186053 | 72278080 | Tubulin beta-6 chain OS=Zea mays GN=TUBB6 PE=2 SV=1                                                               |
| <i>jg25766</i> | RGR | 7 | 72186262 | 72189852 | 72278080 | ADP,ATP carrier protein ER-ANT1 OS=Arabidopsis thaliana GN=ER-<br>ANT1 PE=2 SV=2                                  |
| <i>jg25767</i> | RGR | 7 | 72191589 | 72197849 | 72278080 | Translocon at the outer membrane of chloroplasts 64 OS=Pisum sativum<br>GN=TOC64 PE=1 SV=1                        |
| <i>jg25768</i> | RGR | 7 | 72198621 | 72202291 | 72278080 | Protein C2-DOMAIN ABA-RELATED 4 OS=Arabidopsis thaliana<br>GN=CAR4 PE=1 SV=1                                      |
| <i>jg25769</i> | RGR | 7 | 72199602 | 72202291 | 72278080 | Protein C2-DOMAIN ABA-RELATED 4 OS=Arabidopsis thaliana<br>GN=CAR4 PE=1 SV=1                                      |
| <i>jg25770</i> | RGR | 7 | 72203600 | 72206811 | 72278080 | Auxin efflux carrier component 1a OS=Oryza sativa subsp. japonica<br>GN=PIN1A PE=2 SV=1                           |
| <i>jg25771</i> | RGR | 7 | 72209956 | 72214603 | 72278080 | Phosphoethanolamine N-methyltransferase 1 OS=Arabidopsis thaliana<br>GN=NMT1 PE=1 SV=1                            |
| <i>jg25772</i> | RGR | 7 | 72215525 | 72218763 | 72278080 | Protection of telomeres protein 1b OS=Arabidopsis thaliana GN=POT1B<br>PE=1 SV=1                                  |
| <i>jg25773</i> | RGR | 7 | 72216575 | 72218763 | 72278080 | Protection of telomeres protein 1a OS=Arabidopsis thaliana GN=POT1A<br>PE=1 SV=1                                  |
| <i>jg25774</i> | RGR | 7 | 72222522 | 72224501 | 72278080 | NA                                                                                                                |
| <i>jg25775</i> | RGR | 7 | 72224530 | 72225795 | 72278080 | Protection of telomeres protein 1b OS=Arabidopsis thaliana GN=POT1B<br>PE=1 SV=1                                  |
| <i>jg25776</i> | RGR | 7 | 72226710 | 72231811 | 72278080 | Protection of telomeres protein 1b OS=Arabidopsis thaliana GN=POT1B<br>PE=1 SV=1                                  |
| <i>jg25777</i> | RGR | 7 | 72232326 | 72237324 | 72278080 | ERAD-associated E3 ubiquitin-protein ligase component HRD3A<br>OS=Arabidopsis thaliana GN=HRD3A PE=1 SV=1         |

|                |     |   |          |          |          |                                                                                                 |
|----------------|-----|---|----------|----------|----------|-------------------------------------------------------------------------------------------------|
| <i>jg25778</i> | RGR | 7 | 72238290 | 72240035 | 72278080 | ABC transporter I family member 17 OS=Arabidopsis thaliana<br>GN=ABCI17 PE=2 SV=1               |
| <i>jg25779</i> | RGR | 7 | 72240038 | 72242178 | 72278080 | Uncharacterized protein At3g17950 OS=Arabidopsis thaliana GN=Y-3<br>PE=1 SV=1                   |
| <i>jg25780</i> | RGR | 7 | 72244960 | 72246935 | 72278080 | NA                                                                                              |
| <i>jg25781</i> | RGR | 7 | 72244960 | 72250452 | 72278080 | NA                                                                                              |
| <i>jg25783</i> | RGR | 7 | 72264814 | 72269671 | 72278080 | ABC transporter G family member 2 OS=Arabidopsis thaliana<br>GN=ABCG2 PE=2 SV=1                 |
| <i>jg25784</i> | RGR | 7 | 72266409 | 72273879 | 72278080 | TPR repeat-containing thioredoxin TDX OS=Arabidopsis thaliana<br>GN=TDX PE=1 SV=1               |
| <i>jg25785</i> | RGR | 7 | 72276786 | 72279233 | 72278080 | Factor of DNA methylation 1 OS=Arabidopsis thaliana GN=FDM1 PE=1<br>SV=1                        |
| <i>jg25786</i> | RGR | 7 | 72282086 | 72285488 | 72278080 | Probable inactive receptor kinase At1g48480 OS=Arabidopsis thaliana<br>GN=RKL1 PE=2 SV=1        |
| <i>jg25787</i> | RGR | 7 | 72288913 | 72293093 | 72278080 | NF-X1-type zinc finger protein NFXL1 OS=Arabidopsis thaliana<br>GN=NFXL1 PE=1 SV=1              |
| <i>jg25788</i> | RGR | 7 | 72296867 | 72301102 | 72278080 | Potassium transporter 25 OS=Oryza sativa subsp. japonica GN=HAK25<br>PE=2 SV=1                  |
| <i>jg25789</i> | RGR | 7 | 72302896 | 72320681 | 72278080 | Potassium channel SKOR OS=Arabidopsis thaliana GN=SKOR PE=1<br>SV=1                             |
| <i>jg25790</i> | RGR | 7 | 72302896 | 72314364 | 72278080 | Retrovirus-related Pol polyprotein from transposon TNT 1-94<br>OS=Nicotiana tabacum PE=2 SV=1   |
| <i>jg25791</i> | RGR | 7 | 72317987 | 72320681 | 72278080 | UV-B-induced protein At3g17800, chloroplastic OS=Arabidopsis<br>thaliana GN=At3g17800 PE=2 SV=1 |
| <i>jg25792</i> | RGR | 7 | 72322573 | 72324808 | 72278080 | Purple acid phosphatase 3 OS=Arabidopsis thaliana GN=PAP3 PE=2<br>SV=1                          |
| <i>jg25793</i> | RGR | 7 | 72326217 | 72328418 | 72278080 | Purple acid phosphatase 17 OS=Arabidopsis thaliana GN=PAP17 PE=2<br>SV=1                        |
| <i>jg25794</i> | RGR | 7 | 72330095 | 72333646 | 72278080 | Annexin D5 OS=Arabidopsis thaliana GN=ANN5 PE=2 SV=2                                            |
| <i>jg25796</i> | RGR | 7 | 72341700 | 72344112 | 72278080 | Zinc-finger homeodomain protein 2 OS=Arabidopsis thaliana<br>GN=ZHD1 PE=1 SV=1                  |
| <i>jg25797</i> | RGR | 7 | 72355462 | 72358358 | 72278080 | Protein SHOOT GRAVITROPISM 5 OS=Arabidopsis thaliana GN=SGR5<br>PE=1 SV=1                       |
| <i>jg25798</i> | RGR | 7 | 72362149 | 72366590 | 72278080 | NA                                                                                              |

|                |     |    |          |          |          |                                                                                                                                |
|----------------|-----|----|----------|----------|----------|--------------------------------------------------------------------------------------------------------------------------------|
| <i>jg25801</i> | RGR | 7  | 72382175 | 72388579 | 72278080 | Putative D-cysteine desulfhydrase 1, mitochondrial OS= <i>Oryza sativa</i><br>subsp. <i>japonica</i> GN=Os02g0773300 PE=2 SV=2 |
| <i>jg25802</i> | RGR | 7  | 72388725 | 72394277 | 72278080 | NA                                                                                                                             |
| <i>jg25803</i> | RGR | 7  | 72400092 | 72403648 | 72278080 | Homeobox-leucine zipper protein HDG11 OS= <i>Arabidopsis thaliana</i><br>GN=HDG11 PE=1 SV=1                                    |
| <i>jg25804</i> | RGR | 7  | 72408706 | 72409602 | 72278080 | Universal stress protein A-like protein OS= <i>Arabidopsis thaliana</i><br>GN=At3g01520 PE=1 SV=2                              |
| <i>jg25805</i> | RGR | 7  | 72414575 | 72417060 | 72278080 | NA                                                                                                                             |
| <i>jg25806</i> | RGR | 7  | 72418532 | 72424378 | 72278080 | Rhodanese-like domain-containing protein 8, chloroplastic<br>OS= <i>Arabidopsis thaliana</i> GN=STR8 PE=4 SV=1                 |
| <i>jg25807</i> | RGR | 7  | 72425571 | 72429111 | 72278080 | Probable ADP-ribosylation factor GTPase-activating protein AGD15<br>OS= <i>Arabidopsis thaliana</i> GN=AGD15 PE=2 SV=1         |
| <i>jg25808</i> | RGR | 7  | 72434170 | 72434478 | 72278080 | NA                                                                                                                             |
| <i>jg25809</i> | RGR | 7  | 72435410 | 72439085 | 72278080 | NA                                                                                                                             |
| <i>jg25810</i> | RGR | 7  | 72435410 | 72445981 | 72278080 | Kinesin-like protein KIN-13A OS= <i>Arabidopsis thaliana</i> GN=KIN13A<br>PE=1 SV=1                                            |
| <i>jg25811</i> | RGR | 7  | 72442411 | 72445981 | 72278080 | Kinesin-like protein KIN-13A OS= <i>Arabidopsis thaliana</i> GN=KIN13A<br>PE=1 SV=1                                            |
| <i>jg25812</i> | RGR | 7  | 72442411 | 72445981 | 72278080 | Kinesin-like protein KIN-13A OS= <i>Arabidopsis thaliana</i> GN=KIN13A<br>PE=1 SV=1                                            |
| <i>jg25813</i> | RGR | 7  | 72449149 | 72459437 | 72278080 | Glucose-6-phosphate 1-dehydrogenase 2, chloroplastic OS= <i>Arabidopsis</i><br><i>thaliana</i> GN=At5g13110 PE=1 SV=2          |
| <i>jg25814</i> | RGR | 7  | 72449149 | 72461204 | 72278080 | Glucose-6-phosphate 1-dehydrogenase 3, chloroplastic OS= <i>Arabidopsis</i><br><i>thaliana</i> GN=At1g24280 PE=1 SV=2          |
| <i>jg25815</i> | RGR | 7  | 72483442 | 72486923 | 72278080 | Two-component response regulator ARR14 OS= <i>Arabidopsis thaliana</i><br>GN=ARR14 PE=1 SV=2                                   |
| <i>jg34109</i> | RGR | 11 | 7340081  | 7350415  | 7640538  | DNA mismatch repair protein MLH3 OS= <i>Arabidopsis thaliana</i><br>GN=MLH3 PE=2 SV=2                                          |
| <i>jg34110</i> | RGR | 11 | 7358792  | 7362733  | 7640538  | NA                                                                                                                             |
| <i>jg34111</i> | RGR | 11 | 7360398  | 7362733  | 7640538  | NA                                                                                                                             |
| <i>jg34113</i> | RGR | 11 | 7371932  | 7374185  | 7640538  | AmiNA acid transporter AVT3C OS= <i>Arabidopsis thaliana</i> GN=AVT3C<br>PE=1 SV=1                                             |
| <i>jg34114</i> | RGR | 11 | 7382569  | 7386810  | 7640538  | Pentatricopeptide repeat-containing protein At2g17525, mitochondrial<br>OS= <i>Arabidopsis thaliana</i> GN=At2g17525 PE=2 SV=2 |

|                |     |    |         |         |         |                                                                                                                        |
|----------------|-----|----|---------|---------|---------|------------------------------------------------------------------------------------------------------------------------|
| <i>jg34115</i> | RGR | 11 | 7384316 | 7386810 | 7640538 | Pentatricopeptide repeat-containing protein At2g17525, mitochondrial<br>OS=Arabidopsis thaliana GN=At2g17525 PE=2 SV=2 |
| <i>jg34116</i> | RGR | 11 | 7387436 | 7390438 | 7640538 | Probable protein phosphatase 2C 47 OS=Arabidopsis thaliana<br>GN=At3g51470 PE=1 SV=1                                   |
| <i>jg34117</i> | RGR | 11 | 7391841 | 7396845 | 7640538 | Glutamate receptor 3.6 OS=Arabidopsis thaliana GN=GLR3.6 PE=2 SV=1                                                     |
| <i>jg34118</i> | RGR | 11 | 7397104 | 7403937 | 7640538 | Serine/threonine-protein kinase/endoribonuclease IRE1a<br>OS=Arabidopsis thaliana GN=IRE1A PE=1 SV=1                   |
| <i>jg34119</i> | RGR | 11 | 7408755 | 7408964 | 7640538 | NA                                                                                                                     |
| <i>jg34120</i> | RGR | 11 | 7410274 | 7415991 | 7640538 | Protein PIN-LIKES 7 OS=Arabidopsis thaliana GN=PILS7 PE=2 SV=1                                                         |
| <i>jg34121</i> | RGR | 11 | 7420804 | 7424737 | 7640538 | NA                                                                                                                     |
| <i>jg34122</i> | RGR | 11 | 7431296 | 7435778 | 7640538 | MLO-like protein 8 OS=Arabidopsis thaliana GN=MLO8 PE=1 SV=2                                                           |
| <i>jg34123</i> | RGR | 11 | 7447911 | 7452317 | 7640538 | RING-H2 finger protein ATL8 OS=Arabidopsis thaliana GN=ATL8 PE=2<br>SV=2                                               |
| <i>jg34124</i> | RGR | 11 | 7450955 | 7452317 | 7640538 | RING-H2 finger protein ATL8 OS=Arabidopsis thaliana GN=ATL8 PE=2<br>SV=2                                               |
| <i>jg34125</i> | RGR | 11 | 7463200 | 7467066 | 7640538 | MoNAsaccharide-sensing protein 3 OS=Arabidopsis thaliana<br>GN=MSSP3 PE=2 SV=1                                         |
| <i>jg34126</i> | RGR | 11 | 7481644 | 7485756 | 7640538 | Mitochondrial phosphate carrier protein 1, mitochondrial<br>OS=Arabidopsis thaliana GN=MPT1 PE=2 SV=1                  |
| <i>jg34127</i> | RGR | 11 | 7490363 | 7493668 | 7640538 | Plant intracellular Ras-group-related LRR protein 4 OS=Arabidopsis<br>thaliana GN=PIRL4 PE=1 SV=1                      |
| <i>jg34129</i> | RGR | 11 | 7502644 | 7503773 | 7640538 | NA                                                                                                                     |
| <i>jg34133</i> | RGR | 11 | 7593990 | 7594217 | 7640538 | NA                                                                                                                     |
| <i>jg34134</i> | RGR | 11 | 7598669 | 7601569 | 7640538 | NA                                                                                                                     |
| <i>jg34135</i> | RGR | 11 | 7602469 | 7607412 | 7640538 | Thioredoxin reductase 2 OS=Arabidopsis thaliana GN=NTR2 PE=2 SV=2                                                      |
| <i>jg34136</i> | RGR | 11 | 7612102 | 7612881 | 7640538 | NA                                                                                                                     |
| <i>jg34137</i> | RGR | 11 | 7617130 | 7624134 | 7640538 | AT-rich interactive domain-containing protein 3 OS=Arabidopsis<br>thaliana GN=ARID3 PE=1 SV=1                          |
| <i>jg34138</i> | RGR | 11 | 7635158 | 7639715 | 7640538 | Protein PIN-LIKES 3 OS=Arabidopsis thaliana GN=PILS3 PE=2 SV=1                                                         |
| <i>jg34139</i> | RGR | 11 | 7640083 | 7640609 | 7640538 | NA                                                                                                                     |
| <i>jg34140</i> | RGR | 11 | 7643383 | 7648715 | 7640538 | NA                                                                                                                     |



|                |     |    |         |         |         |                                                                                                                                    |
|----------------|-----|----|---------|---------|---------|------------------------------------------------------------------------------------------------------------------------------------|
| <i>jg34141</i> | RGR | 11 | 7648983 | 7653262 | 7640538 | Protein FAR1-RELATED SEQUENCE 5 OS=Arabidopsis thaliana<br>GN=FRS5 PE=1 SV=1                                                       |
| <i>jg34142</i> | RGR | 11 | 7654885 | 7662765 | 7640538 | Diacylglycerol O-acyltransferase 2D OS=Glycine max GN=DGAT2D<br>PE=1 SV=1                                                          |
| <i>jg34144</i> | RGR | 11 | 7680708 | 7682416 | 7640538 | Succinate dehydrogenase [ubiquinol:ubiquinone] iron-sulfur subunit 2,<br>mitochondrial OS=Arabidopsis thaliana GN=SDH2-2 PE=1 SV=2 |
| <i>jg34146</i> | RGR | 11 | 7695144 | 7695539 | 7640538 | NA                                                                                                                                 |
| <i>jg34147</i> | RGR | 11 | 7712814 | 7717470 | 7640538 | Subtilisin-like protease SBT5.3 OS=Arabidopsis thaliana GN=AIR3 PE=2<br>SV=1                                                       |
| <i>jg34148</i> | RGR | 11 | 7717929 | 7719251 | 7640538 | NA                                                                                                                                 |
| <i>jg34149</i> | RGR | 11 | 7725450 | 7730454 | 7640538 | Probable L-type lectin-domain containing receptor kinase S.5<br>OS=Arabidopsis thaliana GN=LECRKS5 PE=2 SV=1                       |
| <i>jg34150</i> | RGR | 11 | 7727339 | 7730454 | 7640538 | 2-oxoglutarate-dependent dioxygenase DAO OS=Oryza sativa subsp.<br>japonica GN=DAO PE=2 SV=2                                       |
| <i>jg34151</i> | RGR | 11 | 7731640 | 7733211 | 7640538 | 2-oxoglutarate-dependent dioxygenase DAO OS=Oryza sativa subsp.<br>japonica GN=DAO PE=2 SV=2                                       |
| <i>jg34152</i> | RGR | 11 | 7737471 | 7739127 | 7640538 | 2-oxoglutarate-dependent dioxygenase DAO OS=Oryza sativa subsp.<br>japonica GN=DAO PE=2 SV=2                                       |
| <i>jg34153</i> | RGR | 11 | 7744267 | 7745740 | 7640538 | 2-oxoglutarate-dependent dioxygenase DAO OS=Oryza sativa subsp.<br>japonica GN=DAO PE=2 SV=2                                       |
| <i>jg34154</i> | RGR | 11 | 7751466 | 7760617 | 7640538 | Kinesin-like protein KIN-14E OS=Arabidopsis thaliana GN=KIN14E<br>PE=1 SV=1                                                        |
| <i>jg34155</i> | RGR | 11 | 7772806 | 7780563 | 7640538 | Protein root UVB sensitive 1, chloroplastic OS=Arabidopsis thaliana<br>GN=RUS1 PE=1 SV=1                                           |
| <i>jg34157</i> | RGR | 11 | 7772806 | 7780563 | 7640538 | Protein root UVB sensitive 1, chloroplastic OS=Arabidopsis thaliana<br>GN=RUS1 PE=1 SV=1                                           |
| <i>jg34158</i> | RGR | 11 | 7781871 | 7783517 | 7640538 | Pentatricopeptide repeat-containing protein At1g31790 OS=Arabidopsis<br>thaliana GN=PCMP-A1 PE=2 SV=1                              |
| <i>jg34159</i> | RGR | 11 | 7784579 | 7787082 | 7640538 | Probable carotenoid cleavage dioxygenase 4, chloroplastic<br>OS=Arabidopsis thaliana GN=CCD4 PE=1 SV=1                             |
| <i>jg34160</i> | RGR | 11 | 7791183 | 7794908 | 7640538 | Probable apyrase 7 OS=Arabidopsis thaliana GN=APY7 PE=2 SV=1                                                                       |
| <i>jg34161</i> | RGR | 11 | 7798007 | 7802655 | 7640538 | WAT1-related protein At4g19185 OS=Arabidopsis thaliana<br>GN=At4g19185 PE=2 SV=1                                                   |

|                |     |    |          |          |          |                                                                                                                        |
|----------------|-----|----|----------|----------|----------|------------------------------------------------------------------------------------------------------------------------|
| <i>jg34162</i> | RGR | 11 | 7804249  | 7808230  | 7640538  | WAT1-related protein At4g19185 OS=Arabidopsis thaliana<br>GN=At4g19185 PE=2 SV=1                                       |
| <i>jg34163</i> | RGR | 11 | 7813181  | 7819295  | 7640538  | NA                                                                                                                     |
| <i>jg34165</i> | RGR | 11 | 7842496  | 7845728  | 7640538  | ABC transporter G family member 14 OS=Arabidopsis thaliana<br>GN=ABCG14 PE=2 SV=1                                      |
| <i>jg34166</i> | RGR | 11 | 7851127  | 7855908  | 7640538  | Uncharacterized zinc finger CCHC domain-containing protein<br>At4g19190 OS=Arabidopsis thaliana GN=At4g19190 PE=2 SV=1 |
| <i>jg34168</i> | RGR | 11 | 7871566  | 7872816  | 7640538  | NA                                                                                                                     |
| <i>jg34169</i> | RGR | 11 | 7874533  | 7877922  | 7640538  | F-box protein SKIP31 OS=Arabidopsis thaliana GN=SKIP31 PE=1 SV=1                                                       |
| <i>jg34170</i> | RGR | 11 | 7880744  | 7882974  | 7640538  | NA                                                                                                                     |
| <i>jg34171</i> | RGR | 11 | 7885391  | 7890742  | 7640538  | ABC transporter E family member 2 OS=Arabidopsis thaliana<br>GN=ABCE2 PE=2 SV=1                                        |
| <i>jg34172</i> | RGR | 11 | 7891703  | 7894837  | 7640538  | Pentatricopeptide repeat-containing protein At4g19220, mitochondrial<br>OS=Arabidopsis thaliana GN=PCMP-E2 PE=3 SV=2   |
| <i>jg34173</i> | RGR | 11 | 7894945  | 7903169  | 7640538  | ArabiNAsyltransferase XEG113 OS=Arabidopsis thaliana GN=XEG113<br>PE=2 SV=1                                            |
| <i>jg34174</i> | RGR | 11 | 7935438  | 7938257  | 7640538  | Absciscic acid 8'-hydroxylase 1 OS=Arabidopsis thaliana<br>GN=CYP707A1 PE=2 SV=1                                       |
| <i>jg14061</i> | RGI | 1  | 12395195 | 12398889 | 12682868 | Protein trichome birefringence-like 19 OS=Arabidopsis thaliana<br>GN=TBL19 PE=3 SV=1                                   |
| <i>jg14062</i> | RGI | 1  | 12405490 | 12408171 | 12682868 | NA                                                                                                                     |
| <i>jg14063</i> | RGI | 1  | 12417053 | 12422691 | 12682868 | BRCT domain-containing protein At4g02110 OS=Arabidopsis thaliana<br>GN=At4g02110 PE=4 SV=3                             |
| <i>jg14064</i> | RGI | 1  | 12425138 | 12436319 | 12682868 | Cell division cycle protein 27 homolog B OS=Arabidopsis thaliana<br>GN=CDC27B PE=1 SV=1                                |
| <i>jg14066</i> | RGI | 1  | 12456206 | 12458604 | 12682868 | NA                                                                                                                     |
| <i>jg14067</i> | RGI | 1  | 12463841 | 12464059 | 12682868 | NA                                                                                                                     |
| <i>jg14070</i> | RGI | 1  | 12479636 | 12492993 | 12682868 | NA                                                                                                                     |
| <i>jg14071</i> | RGI | 1  | 12508981 | 12516054 | 12682868 | Proline dehydrogenase 2, mitochondrial OS=Arabidopsis thaliana<br>GN=POX2 PE=2 SV=1                                    |
| <i>jg14072</i> | RGI | 1  | 12515232 | 12518551 | 12682868 | Proline dehydrogenase 2, mitochondrial OS=Arabidopsis thaliana<br>GN=POX2 PE=2 SV=1                                    |
| <i>jg14073</i> | RGI | 1  | 12533544 | 12536105 | 12682868 | NA                                                                                                                     |

|                |     |   |          |          |          |                                                                                                                                    |
|----------------|-----|---|----------|----------|----------|------------------------------------------------------------------------------------------------------------------------------------|
| <i>jg14074</i> | RGI | 1 | 12536492 | 12536725 | 12682868 | NA                                                                                                                                 |
| <i>jg14075</i> | RGI | 1 | 12541538 | 12544085 | 12682868 | Probable polygalacturonase OS= <i>Vitis vinifera</i> GN=GSVIVT00026920001<br>PE=1 SV=1                                             |
| <i>jg14076</i> | RGI | 1 | 12555180 | 12556077 | 12682868 | NA                                                                                                                                 |
| <i>jg14077</i> | RGI | 1 | 12559986 | 12563889 | 12682868 | Nuclear poly(A) polymerase 3 OS= <i>Arabidopsis thaliana</i> GN=PAPS3<br>PE=1 SV=1                                                 |
| <i>jg14078</i> | RGI | 1 | 12565150 | 12570197 | 12682868 | Remorin OS= <i>Solanum tuberosum</i> PE=1 SV=1                                                                                     |
| <i>jg14079</i> | RGI | 1 | 12565150 | 12570197 | 12682868 | Remorin OS= <i>Solanum tuberosum</i> PE=1 SV=1                                                                                     |
| <i>jg14080</i> | RGI | 1 | 12577270 | 12579666 | 12682868 | NA                                                                                                                                 |
| <i>jg14081</i> | RGI | 1 | 12581936 | 12583421 | 12682868 | NA                                                                                                                                 |
| <i>jg14083</i> | RGI | 1 | 12612301 | 12616652 | 12682868 | Protein CHROMOSOME TRANSMISSION FIDELITY 7 OS= <i>Arabidopsis thaliana</i> GN=CTF7 PE=1 SV=1                                       |
| <i>jg14084</i> | RGI | 1 | 12618579 | 12622723 | 12682868 | Probable inactive ATP-dependent zinc metalloprotease FTSHI 3,<br>chloroplastic OS= <i>Arabidopsis thaliana</i> GN=FTSHI3 PE=1 SV=1 |
| <i>jg14085</i> | RGI | 1 | 12624241 | 12627296 | 12682868 | TMV resistance protein N OS= <i>Nicotiana glutiN</i> asa GN=N PE=1 SV=1                                                            |
| <i>jg14086</i> | RGI | 1 | 12633228 | 12637440 | 12682868 | TMV resistance protein N OS= <i>Nicotiana glutiN</i> asa GN=N PE=1 SV=1                                                            |
| <i>jg14087</i> | RGI | 1 | 12649456 | 12649719 | 12682868 | NA                                                                                                                                 |
| <i>jg14088</i> | RGI | 1 | 12674787 | 12678856 | 12682868 | NA                                                                                                                                 |
| <i>jg14089</i> | RGI | 1 | 12680766 | 12683017 | 12682868 | NA                                                                                                                                 |
| <i>jg14090</i> | RGI | 1 | 12718700 | 12723251 | 12682868 | Protein NSP-INTERACTING KINASE 1 OS= <i>Arabidopsis thaliana</i><br>GN=NIK1 PE=1 SV=1                                              |
| <i>jg14091</i> | RGI | 1 | 12727824 | 12729930 | 12682868 | 60S ribosomal protein L9 OS= <i>Pisum sativum</i> GN=RPL9 PE=2 SV=1                                                                |
| <i>jg14092</i> | RGI | 1 | 12739643 | 12741800 | 12682868 | Zinc finger protein CONSTANS-LIKE 2 OS= <i>Arabidopsis thaliana</i><br>GN=COL2 PE=1 SV=1                                           |
| <i>jg14093</i> | RGI | 1 | 12764143 | 12768037 | 12682868 | NA                                                                                                                                 |
| <i>jg14094</i> | RGI | 1 | 12787512 | 12790954 | 12682868 | Calcium-transporting ATPase 12, plasma membrane-type<br>OS= <i>Arabidopsis thaliana</i> GN=ACA12 PE=2 SV=1                         |
| <i>jg14095</i> | RGI | 1 | 12788100 | 12790954 | 12682868 | Calcium-transporting ATPase 12, plasma membrane-type<br>OS= <i>Arabidopsis thaliana</i> GN=ACA12 PE=2 SV=1                         |
| <i>jg14096</i> | RGI | 1 | 12792057 | 12792518 | 12682868 | Probable prolyl 4-hydroxylase 7 OS= <i>Arabidopsis thaliana</i> GN=P4H7<br>PE=2 SV=1                                               |
| <i>jg14097</i> | RGI | 1 | 12797567 | 12801146 | 12682868 | NA                                                                                                                                 |
| <i>jg14098</i> | RGI | 1 | 12805123 | 12807864 | 12682868 | 6-phosphogluconate dehydrogenase, decarboxylating 3 OS= <i>Arabidopsis thaliana</i> GN=At3g02360 PE=2 SV=1                         |

|                |     |   |          |          |          |                                                                                                                      |
|----------------|-----|---|----------|----------|----------|----------------------------------------------------------------------------------------------------------------------|
| <i>jg14099</i> | RGI | 1 | 12811822 | 12814765 | 12682868 | Transcription factor MYB83 OS=Arabidopsis thaliana GN=MYB83 PE=2 SV=1                                                |
| <i>jg14100</i> | RGI | 1 | 12825302 | 12828373 | 12682868 | Probable galacturoNAsyltransferase 9 OS=Arabidopsis thaliana GN=GAUT9 PE=2 SV=1                                      |
| <i>jg14101</i> | RGI | 1 | 12836106 | 12838154 | 12682868 | Basic leucine zipper 43 OS=Arabidopsis thaliana GN=BZIP43 PE=1 SV=1                                                  |
| <i>jg14102</i> | RGI | 1 | 12859883 | 12861558 | 12682868 | NA                                                                                                                   |
| <i>jg14103</i> | RGI | 1 | 12883038 | 12884190 | 12682868 | NA                                                                                                                   |
| <i>jg14104</i> | RGI | 1 | 12884323 | 12884773 | 12682868 | NA                                                                                                                   |
| <i>jg14105</i> | RGI | 1 | 12890024 | 12890309 | 12682868 | NA                                                                                                                   |
| <i>jg14106</i> | RGI | 1 | 12890682 | 12892518 | 12682868 | E3 ubiquitin-protein ligase RING1-like OS=Arabidopsis thaliana GN=At3g19950 PE=1 SV=1                                |
| <i>jg14107</i> | RGI | 1 | 12895959 | 12900382 | 12682868 | WPP domain-interacting tail-anchored protein 1 OS=Arabidopsis thaliana GN=WIT1 PE=1 SV=2                             |
| <i>jg14108</i> | RGI | 1 | 12905019 | 12906422 | 12682868 | NA                                                                                                                   |
| <i>jg14109</i> | RGI | 1 | 12912961 | 12914956 | 12682868 | NA                                                                                                                   |
| <i>jg14110</i> | RGI | 1 | 12916615 | 12917436 | 12682868 | Umecyanin OS=Armoracia rusticana PE=1 SV=1                                                                           |
| <i>jg14111</i> | RGI | 1 | 12922059 | 12926156 | 12682868 | NA                                                                                                                   |
| <i>jg14112</i> | RGI | 1 | 12927164 | 12927466 | 12682868 | NA                                                                                                                   |
| <i>jg14113</i> | RGI | 1 | 12928688 | 12933464 | 12682868 | ATP sulfurylase 2 OS=Arabidopsis thaliana GN=APS2 PE=1 SV=1                                                          |
| <i>jg14114</i> | RGI | 1 | 12935863 | 12936426 | 12682868 | NA                                                                                                                   |
| <i>jg14115</i> | RGI | 1 | 12946194 | 12948330 | 12682868 | NA                                                                                                                   |
| <i>jg14116</i> | RGI | 1 | 12960639 | 12961216 | 12682868 | NA                                                                                                                   |
| <i>jg14117</i> | RGI | 1 | 12968484 | 12972579 | 12682868 | AmiNA acid transporter AVT6A OS=Arabidopsis thaliana GN=AVT6A PE=2 SV=1                                              |
| <i>jg14699</i> | RGI | 1 | 18983165 | 18991229 | 19279047 | NA                                                                                                                   |
| <i>jg14700</i> | RGI | 1 | 18999703 | 19012516 | 19279047 | Succinate dehydrogenase [ubiquinol] iron-sulfur subunit 2, mitochondrial OS=Arabidopsis thaliana GN=SDH2-2 PE=1 SV=2 |
| <i>jg14701</i> | RGI | 1 | 18999703 | 19007333 | 19279047 | Ent-kaur-16-ene synthase, chloroplastic OS=Cucurbita maxima PE=1 SV=1                                                |
| <i>jg14702</i> | RGI | 1 | 19010065 | 19012516 | 19279047 | 60S ribosomal protein L2, mitochondrial OS=Oryza sativa subsp. japonica GN=RPL2 PE=2 SV=2                            |
| <i>jg14703</i> | RGI | 1 | 19010065 | 19012516 | 19279047 | 60S ribosomal protein L2, mitochondrial OS=Oryza sativa subsp. japonica GN=RPL2 PE=2 SV=2                            |

|                |     |   |          |          |          |                                                                                                                             |
|----------------|-----|---|----------|----------|----------|-----------------------------------------------------------------------------------------------------------------------------|
| <i>jg14704</i> | RGI | 1 | 19050633 | 19054799 | 19279047 | ALA-interacting subunit 3 OS=Arabidopsis thaliana GN=ALIS3 PE=1 SV=1                                                        |
| <i>jg14705</i> | RGI | 1 | 19064845 | 19065237 | 19279047 | NA                                                                                                                          |
| <i>jg14706</i> | RGI | 1 | 19148948 | 19155299 | 19279047 | Probable choline kinase 2 OS=Arabidopsis thaliana GN=At1g74320 PE=2 SV=1                                                    |
| <i>jg14708</i> | RGI | 1 | 19189787 | 19200269 | 19279047 | Type IV iNAitol polyphosphate 5-phosphatase 3 OS=Arabidopsis thaliana GN=IP5P3 PE=1 SV=1                                    |
| <i>jg14709</i> | RGI | 1 | 19230646 | 19237541 | 19279047 | 30S ribosomal protein S1, chloroplastic OS=Arabidopsis thaliana GN=RPS1 PE=1 SV=1                                           |
| <i>jg14710</i> | RGI | 1 | 19258366 | 19260389 | 19279047 | NA                                                                                                                          |
| <i>jg14711</i> | RGI | 1 | 19340484 | 19341407 | 19279047 | NA                                                                                                                          |
| <i>jg14712</i> | RGI | 1 | 19357584 | 19365533 | 19279047 | Protein unc-13 homolog OS=Arabidopsis thaliana GN=PATROL1 PE=2 SV=1                                                         |
| <i>jg14713</i> | RGI | 1 | 19366189 | 19367438 | 19279047 | NA                                                                                                                          |
| <i>jg14714</i> | RGI | 1 | 19368652 | 19370647 | 19279047 | Putative pentatricopeptide repeat-containing protein At5g59200, chloroplastic OS=Arabidopsis thaliana GN=PCMP-E41 PE=3 SV=1 |
| <i>jg14715</i> | RGI | 1 | 19383445 | 19385457 | 19279047 | Putative pentatricopeptide repeat-containing protein At5g59200, chloroplastic OS=Arabidopsis thaliana GN=PCMP-E41 PE=3 SV=1 |
| <i>jg14716</i> | RGI | 1 | 19386654 | 19387903 | 19279047 | NA                                                                                                                          |
| <i>jg14717</i> | RGI | 1 | 19388587 | 19394608 | 19279047 | Protein unc-13 homolog OS=Arabidopsis thaliana GN=PATROL1 PE=2 SV=1                                                         |
| <i>jg14718</i> | RGI | 1 | 19424930 | 19425350 | 19279047 | NA                                                                                                                          |
| <i>jg14719</i> | RGI | 1 | 19445887 | 19448340 | 19279047 | NA                                                                                                                          |
| <i>jg10663</i> | RGI | 2 | 11664180 | 11666357 | 11936562 | Peptide-N4-(N-acetyl-beta-glucosaminy)asparagine amidase A OS=Prunus dulcis PE=1 SV=2                                       |
| <i>jg10664</i> | RGI | 2 | 11680552 | 11689084 | 11936562 | ATP-dependent zinc metalloprotease FTSH 10, mitochondrial OS=Arabidopsis thaliana GN=FTSH10 PE=1 SV=1                       |
| <i>jg10665</i> | RGI | 2 | 11698406 | 11702416 | 11936562 | Phytosulfokine receptor 2 OS=Arabidopsis thaliana GN=PSKR2 PE=2 SV=1                                                        |
| <i>jg10666</i> | RGI | 2 | 11703640 | 11704182 | 11936562 | NA                                                                                                                          |
| <i>jg10667</i> | RGI | 2 | 11706541 | 11707932 | 11936562 | NA                                                                                                                          |
| <i>jg10669</i> | RGI | 2 | 11729067 | 11730461 | 11936562 | NA                                                                                                                          |
| <i>jg10670</i> | RGI | 2 | 11751111 | 11758543 | 11936562 | Putative threonine aspartase OS=Arabidopsis thaliana GN=At4g00590 PE=2 SV=3                                                 |

|                |     |   |          |          |          |                                                                                                           |
|----------------|-----|---|----------|----------|----------|-----------------------------------------------------------------------------------------------------------|
| <i>jg10671</i> | RGI | 2 | 11782380 | 11783032 | 11936562 | NA                                                                                                        |
| <i>jg10672</i> | RGI | 2 | 11786368 | 11787742 | 11936562 | Early NAdulin-like protein 2 OS=Arabidopsis thaliana GN=At4g27520<br>PE=1 SV=1                            |
| <i>jg10673</i> | RGI | 2 | 11806069 | 11806513 | 11936562 | NA                                                                                                        |
| <i>jg10674</i> | RGI | 2 | 11808154 | 11808504 | 11936562 | NA                                                                                                        |
| <i>jg10675</i> | RGI | 2 | 11812100 | 11814447 | 11936562 | VQ motif-containing protein 4 OS=Arabidopsis thaliana GN=VQ4 PE=1<br>SV=1                                 |
| <i>jg10676</i> | RGI | 2 | 11843690 | 11849470 | 11936562 | Dynamin-related protein 5A OS=Arabidopsis thaliana GN=DRP5A PE=2<br>SV=1                                  |
| <i>jg10677</i> | RGI | 2 | 11881676 | 11899440 | 11936562 | Protein SPA1-RELATED 3 OS=Arabidopsis thaliana GN=SPA3 PE=1<br>SV=1                                       |
| <i>jg10678</i> | RGI | 2 | 11900996 | 11901450 | 11936562 | NA                                                                                                        |
| <i>jg10679</i> | RGI | 2 | 11902700 | 11903727 | 11936562 | NA                                                                                                        |
| <i>jg10680</i> | RGI | 2 | 11911842 | 11915747 | 11936562 | NA                                                                                                        |
| <i>jg10681</i> | RGI | 2 | 11920453 | 11924880 | 11936562 | Beta-glucuronAsyltransferase GlcAT14A OS=Arabidopsis thaliana<br>GN=GLCAT14A PE=2 SV=1                    |
| <i>jg10682</i> | RGI | 2 | 11935244 | 11935462 | 11936562 | NA                                                                                                        |
| <i>jg10683</i> | RGI | 2 | 11959302 | 11960266 | 11936562 | NA                                                                                                        |
| <i>jg10684</i> | RGI | 2 | 11978496 | 11983686 | 11936562 | Proton pump-interactor 1 OS=Arabidopsis thaliana GN=PPI1 PE=1 SV=2                                        |
| <i>jg10685</i> | RGI | 2 | 11999255 | 12003793 | 11936562 | Chromatin remodeling protein EBS OS=Arabidopsis thaliana GN=EBS<br>PE=1 SV=1                              |
| <i>jg10686</i> | RGI | 2 | 12005709 | 12006053 | 11936562 | NA                                                                                                        |
| <i>jg10687</i> | RGI | 2 | 12028634 | 12044115 | 11936562 | Protein SAWADEE HOMEODOMAIN HOMOLOG 2 OS=Arabidopsis<br>thaliana GN=SHH2 PE=2 SV=1                        |
| <i>jg10688</i> | RGI | 2 | 12045048 | 12047290 | 11936562 | NA                                                                                                        |
| <i>jg10689</i> | RGI | 2 | 12057214 | 12060969 | 11936562 | NA                                                                                                        |
| <i>jg10690</i> | RGI | 2 | 12061012 | 12061284 | 11936562 | NA                                                                                                        |
| <i>jg10691</i> | RGI | 2 | 12065979 | 12067101 | 11936562 | RING-H2 finger protein ATL60 OS=Arabidopsis thaliana GN=ATL60<br>PE=2 SV=1                                |
| <i>jg10692</i> | RGI | 2 | 12094247 | 12106452 | 11936562 | NA                                                                                                        |
| <i>jg10693</i> | RGI | 2 | 12136124 | 12140499 | 11936562 | 3-deoxy-manNA-octulosonate cytidyltransferase, mitochondrial<br>OS=Arabidopsis thaliana GN=KDSB PE=1 SV=1 |
| <i>jg10694</i> | RGI | 2 | 12165613 | 12168242 | 11936562 | NA                                                                                                        |

|                 |     |   |          |          |          |                                                                                                                        |
|-----------------|-----|---|----------|----------|----------|------------------------------------------------------------------------------------------------------------------------|
| <i>jpg10695</i> | RGI | 2 | 12187152 | 12189525 | 11936562 | E3 ubiquitin-protein ligase RMA3 OS=Arabidopsis thaliana GN=RMA3<br>PE=1 SV=1                                          |
| <i>jpg10696</i> | RGI | 2 | 12203573 | 12206427 | 11936562 | Thioredoxin M4, chloroplastic OS=Arabidopsis thaliana GN=At3g15360<br>PE=2 SV=2                                        |
| <i>jpg9890</i>  | RGI | 3 | 23745314 | 23745925 | 24016456 | NA                                                                                                                     |
| <i>jpg9891</i>  | RGI | 3 | 23777208 | 23779817 | 24016456 | NA                                                                                                                     |
| <i>jpg9892</i>  | RGI | 3 | 23784770 | 23785298 | 24016456 | NA                                                                                                                     |
| <i>jpg9893</i>  | RGI | 3 | 23789176 | 23791752 | 24016456 | NA                                                                                                                     |
| <i>jpg9894</i>  | RGI | 3 | 23791790 | 23792894 | 24016456 | NA                                                                                                                     |
| <i>jpg9895</i>  | RGI | 3 | 23816295 | 23816501 | 24016456 | NA                                                                                                                     |
| <i>jpg9896</i>  | RGI | 3 | 23816590 | 23818419 | 24016456 | NA                                                                                                                     |
| <i>jpg9897</i>  | RGI | 3 | 23826475 | 23827312 | 24016456 | NA                                                                                                                     |
| <i>jpg9898</i>  | RGI | 3 | 23831193 | 23831474 | 24016456 | NA                                                                                                                     |
| <i>jpg9899</i>  | RGI | 3 | 23840827 | 23845390 | 24016456 | NA                                                                                                                     |
| <i>jpg9900</i>  | RGI | 3 | 23880179 | 23883989 | 24016456 | Gibberellin 2-beta-dioxygenase 8 OS=Arabidopsis thaliana GN=GA2OX8<br>PE=1 SV=2                                        |
| <i>jpg9901</i>  | RGI | 3 | 23946978 | 23948341 | 24016456 | Protein NDR1 OS=Arabidopsis thaliana GN=NDR1 PE=1 SV=1                                                                 |
| <i>jpg9902</i>  | RGI | 3 | 23948674 | 23949482 | 24016456 | GDSL esterase/lipase At3g26430 OS=Arabidopsis thaliana<br>GN=At3g26430 PE=2 SV=1                                       |
| <i>jpg9903</i>  | RGI | 3 | 23985894 | 23993868 | 24016456 | Probable lysine-specific demethylase JM14 OS=Arabidopsis thaliana<br>GN=JM14 PE=1 SV=1                                 |
| <i>jpg9904</i>  | RGI | 3 | 24007152 | 24011878 | 24016456 | NA                                                                                                                     |
| <i>jpg9905</i>  | RGI | 3 | 24075154 | 24075638 | 24016456 | NA                                                                                                                     |
| <i>jpg9906</i>  | RGI | 3 | 24113707 | 24114168 | 24016456 | NA                                                                                                                     |
| <i>jpg9907</i>  | RGI | 3 | 24127747 | 24128157 | 24016456 | NA                                                                                                                     |
| <i>jpg9908</i>  | RGI | 3 | 24133793 | 24134102 | 24016456 | NA                                                                                                                     |
| <i>jpg9909</i>  | RGI | 3 | 24139643 | 24142409 | 24016456 | NA                                                                                                                     |
| <i>jpg9910</i>  | RGI | 3 | 24151934 | 24152568 | 24016456 | NA                                                                                                                     |
| <i>jpg9911</i>  | RGI | 3 | 24168218 | 24169151 | 24016456 | NA                                                                                                                     |
| <i>jpg9912</i>  | RGI | 3 | 24171463 | 24179855 | 24016456 | Pentatricopeptide repeat-containing protein At4g04790, mitochondrial<br>OS=Arabidopsis thaliana GN=At4g04790 PE=2 SV=2 |
| <i>jpg9913</i>  | RGI | 3 | 24180439 | 24180959 | 24016456 | NA                                                                                                                     |
| <i>jpg9914</i>  | RGI | 3 | 24181413 | 24182499 | 24016456 | NA                                                                                                                     |

|                |     |   |          |          |          |                                                                                                        |
|----------------|-----|---|----------|----------|----------|--------------------------------------------------------------------------------------------------------|
| <i>jpg9915</i> | RGI | 3 | 24205738 | 24209618 | 24016456 | Polycomb group protein FERTILIZATION-INDEPENDENT<br>ENDOSPERM OS=Arabidopsis thaliana GN=FIE PE=1 SV=2 |
| <i>jpg9916</i> | RGI | 3 | 24210563 | 24222136 | 24016456 | NA                                                                                                     |
| <i>jpg9917</i> | RGI | 3 | 24248753 | 24249339 | 24016456 | NA                                                                                                     |
| <i>jpg9918</i> | RGI | 3 | 24249848 | 24250132 | 24016456 | NA                                                                                                     |
| <i>jpg9919</i> | RGI | 3 | 24269405 | 24275961 | 24016456 | Autophagy-related protein 18f OS=Arabidopsis thaliana GN=ATG18F<br>PE=2 SV=1                           |
| <i>jpg9920</i> | RGI | 3 | 24280229 | 24284506 | 24016456 | NA                                                                                                     |
| <i>jpg9921</i> | RGI | 3 | 24285771 | 24286019 | 24016456 | NA                                                                                                     |
| <i>jpg9922</i> | RGI | 3 | 24286075 | 24286509 | 24016456 | NA                                                                                                     |
| <i>jpg9923</i> | RGI | 3 | 24294716 | 24299783 | 24016456 | Probable galacturoNAsyltransferase 12 OS=Arabidopsis thaliana<br>GN=GAUT12 PE=2 SV=1                   |
| <i>jpg9924</i> | RGI | 3 | 24296189 | 24299783 | 24016456 | Probable galacturoNAsyltransferase 12 OS=Arabidopsis thaliana<br>GN=GAUT12 PE=2 SV=1                   |
| <i>jpg9925</i> | RGI | 3 | 24299801 | 24302354 | 24016456 | Transcription factor ILR3 OS=Arabidopsis thaliana GN=ILR3 PE=1 SV=1                                    |
| <i>jpg9926</i> | RGI | 3 | 24314798 | 24315188 | 24016456 | NA                                                                                                     |
| <i>jpg5699</i> | RGI | 4 | 33759434 | 33760223 | 34059117 | NA                                                                                                     |
| <i>jpg5700</i> | RGI | 4 | 33834284 | 33835146 | 34059117 | NA                                                                                                     |
| <i>jpg5701</i> | RGI | 4 | 33865721 | 33866954 | 34059117 | NA                                                                                                     |
| <i>jpg5702</i> | RGI | 4 | 33873434 | 33878086 | 34059117 | Transcription factor MYB113 OS=Arabidopsis thaliana GN=MYB113<br>PE=1 SV=1                             |
| <i>jpg5703</i> | RGI | 4 | 33877875 | 33878175 | 34059117 | NA                                                                                                     |
| <i>jpg5704</i> | RGI | 4 | 33880254 | 33881242 | 34059117 | Copper transporter 6 OS=Arabidopsis thaliana GN=COPT6 PE=2 SV=1                                        |
| <i>jpg5705</i> | RGI | 4 | 33896330 | 33900051 | 34059117 | Heme-binding-like protein At3g10130, chloroplastic OS=Arabidopsis<br>thaliana GN=At3g10130 PE=1 SV=1   |
| <i>jpg5706</i> | RGI | 4 | 33905779 | 33921599 | 34059117 | NA                                                                                                     |
| <i>jpg5707</i> | RGI | 4 | 33918026 | 33919154 | 34059117 | Transcription factor bHLH155 OS=Arabidopsis thaliana GN=BHLH155<br>PE=1 SV=1                           |
| <i>jpg5708</i> | RGI | 4 | 33947361 | 33947816 | 34059117 | NA                                                                                                     |
| <i>jpg5709</i> | RGI | 4 | 33963649 | 33964761 | 34059117 | Trypsin inhibitor A OS=Glycine max GN=KTI3 PE=1 SV=2                                                   |
| <i>jpg5710</i> | RGI | 4 | 34007199 | 34007477 | 34059117 | NA                                                                                                     |
| <i>jpg5711</i> | RGI | 4 | 34007622 | 34007927 | 34059117 | NA                                                                                                     |



|               |     |   |          |          |          |                                                                                       |
|---------------|-----|---|----------|----------|----------|---------------------------------------------------------------------------------------|
| <i>jg5712</i> | RGI | 4 | 34014973 | 34015359 | 34059117 | NA                                                                                    |
| <i>jg5713</i> | RGI | 4 | 34040459 | 34043873 | 34059117 | NA                                                                                    |
| <i>jg5714</i> | RGI | 4 | 34102429 | 34104113 | 34059117 | NA                                                                                    |
| <i>jg5715</i> | RGI | 4 | 34107412 | 34110570 | 34059117 | MDIS1-interacting receptor like kinase 2 OS=Arabidopsis thaliana<br>GN=MIK2 PE=1 SV=3 |
| <i>jg5716</i> | RGI | 4 | 34111675 | 34112086 | 34059117 | NA                                                                                    |
| <i>jg5717</i> | RGI | 4 | 34123034 | 34123246 | 34059117 | NA                                                                                    |
| <i>jg5718</i> | RGI | 4 | 34127540 | 34127815 | 34059117 | NA                                                                                    |
| <i>jg5719</i> | RGI | 4 | 34139360 | 34139928 | 34059117 | NA                                                                                    |
| <i>jg5720</i> | RGI | 4 | 34152953 | 34153876 | 34059117 | Putative lipid-transfer protein DIR1 OS=Arabidopsis thaliana GN=DIR1<br>PE=1 SV=1     |
| <i>jg5721</i> | RGI | 4 | 34160099 | 34161222 | 34059117 | Copper transporter 6 OS=Arabidopsis thaliana GN=COPT6 PE=2 SV=1                       |
| <i>jg5722</i> | RGI | 4 | 34180070 | 34182345 | 34059117 | NA                                                                                    |
| <i>jg5723</i> | RGI | 4 | 34182413 | 34188520 | 34059117 | NA                                                                                    |
| <i>jg5724</i> | RGI | 4 | 34206171 | 34207217 | 34059117 | 17.8 kDa class I heat shock protein OS=Arabidopsis thaliana<br>GN=HSP17.8 PE=1 SV=1   |
| <i>jg5725</i> | RGI | 4 | 34224185 | 34227102 | 34059117 | NA                                                                                    |
| <i>jg5726</i> | RGI | 4 | 34252021 | 34256631 | 34059117 | NA                                                                                    |
| <i>jg5727</i> | RGI | 4 | 34274100 | 34274330 | 34059117 | NA                                                                                    |
| <i>jg5728</i> | RGI | 4 | 34291615 | 34292420 | 34059117 | NA                                                                                    |
| <i>jg5729</i> | RGI | 4 | 34297913 | 34298231 | 34059117 | NA                                                                                    |
| <i>jg5730</i> | RGI | 4 | 34316790 | 34317388 | 34059117 | NA                                                                                    |
| <i>jg5731</i> | RGI | 4 | 34320030 | 34321244 | 34059117 | NA                                                                                    |
| <i>jg5732</i> | RGI | 4 | 34331678 | 34332592 | 34059117 | NA                                                                                    |
| <i>jg5733</i> | RGI | 4 | 34342659 | 34343907 | 34059117 | NA                                                                                    |
| <i>jg5734</i> | RGI | 4 | 34349393 | 34351198 | 34059117 | NA                                                                                    |
| <i>jg5987</i> | RGI | 4 | 39510803 | 39523641 | 39812897 | NA                                                                                    |
| <i>jg5988</i> | RGI | 4 | 39534515 | 39535463 | 39812897 | NA                                                                                    |
| <i>jg5989</i> | RGI | 4 | 39548805 | 39549664 | 39812897 | NA                                                                                    |
| <i>jg5990</i> | RGI | 4 | 39549865 | 39550185 | 39812897 | NA                                                                                    |
| <i>jg5991</i> | RGI | 4 | 39551163 | 39551813 | 39812897 | NA                                                                                    |
| <i>jg5992</i> | RGI | 4 | 39553064 | 39554242 | 39812897 | NA                                                                                    |
| <i>jg5993</i> | RGI | 4 | 39554661 | 39559447 | 39812897 | NA                                                                                    |

|               |     |   |          |          |          |                                                                                                              |
|---------------|-----|---|----------|----------|----------|--------------------------------------------------------------------------------------------------------------|
| <i>lg5994</i> | RGI | 4 | 39560523 | 39561051 | 39812897 | NA                                                                                                           |
| <i>lg5995</i> | RGI | 4 | 39561231 | 39561842 | 39812897 | NA                                                                                                           |
| <i>lg5996</i> | RGI | 4 | 39562353 | 39563942 | 39812897 | NA                                                                                                           |
| <i>lg5997</i> | RGI | 4 | 39564057 | 39568346 | 39812897 | NA                                                                                                           |
| <i>lg5998</i> | RGI | 4 | 39602806 | 39603231 | 39812897 | NA                                                                                                           |
| <i>lg5999</i> | RGI | 4 | 39612039 | 39615538 | 39812897 | NA                                                                                                           |
| <i>lg6000</i> | RGI | 4 | 39616798 | 39617666 | 39812897 | NA                                                                                                           |
| <i>lg6001</i> | RGI | 4 | 39615767 | 39620127 | 39812897 | Protein TPR3 OS= <i>Oryza sativa</i> subsp. <i>japonica</i> GN=TPR3 PE=1 SV=1                                |
| <i>lg6002</i> | RGI | 4 | 39616798 | 39620127 | 39812897 | Topless-related protein 1 OS= <i>Arabidopsis thaliana</i> GN=TPR1 PE=1 SV=3                                  |
| <i>lg6003</i> | RGI | 4 | 39620519 | 39620800 | 39812897 | NA                                                                                                           |
| <i>lg6004</i> | RGI | 4 | 39641257 | 39644445 | 39812897 | NA                                                                                                           |
| <i>lg6005</i> | RGI | 4 | 39645736 | 39646624 | 39812897 | NA                                                                                                           |
| <i>lg6006</i> | RGI | 4 | 39651683 | 39652114 | 39812897 | NA                                                                                                           |
| <i>lg6007</i> | RGI | 4 | 39666137 | 39666726 | 39812897 | NA                                                                                                           |
| <i>lg6008</i> | RGI | 4 | 39691394 | 39692140 | 39812897 | NA                                                                                                           |
| <i>lg6009</i> | RGI | 4 | 39786226 | 39787136 | 39812897 | NA                                                                                                           |
| <i>lg6010</i> | RGI | 4 | 39828060 | 39828497 | 39812897 | NA                                                                                                           |
| <i>lg6011</i> | RGI | 4 | 39892075 | 39892784 | 39812897 | NA                                                                                                           |
| <i>lg6012</i> | RGI | 4 | 39966830 | 39971381 | 39812897 | Pentatricopeptide repeat-containing protein At3g09060 OS= <i>Arabidopsis thaliana</i> GN=At3g09060 PE=2 SV=1 |
| <i>lg6013</i> | RGI | 4 | 39966830 | 39971381 | 39812897 | Pentatricopeptide repeat-containing protein At3g09060 OS= <i>Arabidopsis thaliana</i> GN=At3g09060 PE=2 SV=1 |
| <i>lg6014</i> | RGI | 4 | 39980082 | 40000419 | 39812897 | NA                                                                                                           |
| <i>lg6015</i> | RGI | 4 | 39999004 | 40000419 | 39812897 | NA                                                                                                           |
| <i>lg6016</i> | RGI | 4 | 40003722 | 40004879 | 39812897 | NA                                                                                                           |
| <i>lg6017</i> | RGI | 4 | 40005207 | 40008450 | 39812897 | Protein NRT1/ PTR FAMILY 8.1 OS= <i>Arabidopsis thaliana</i> GN=NPF8.1 PE=1 SV=1                             |
| <i>lg6018</i> | RGI | 4 | 40020307 | 40022696 | 39812897 | NA                                                                                                           |
| <i>lg6019</i> | RGI | 4 | 40024774 | 40024974 | 39812897 | NA                                                                                                           |
| <i>lg6020</i> | RGI | 4 | 40034564 | 40035151 | 39812897 | NA                                                                                                           |
| <i>lg6021</i> | RGI | 4 | 40039665 | 40052665 | 39812897 | NA                                                                                                           |
| <i>lg6022</i> | RGI | 4 | 40061826 | 40062026 | 39812897 | NA                                                                                                           |
| <i>lg6023</i> | RGI | 4 | 40070325 | 40071415 | 39812897 | NA                                                                                                           |

|               |     |   |          |          |          |                                                                                                         |
|---------------|-----|---|----------|----------|----------|---------------------------------------------------------------------------------------------------------|
| <i>jg6024</i> | RGI | 4 | 40099842 | 40102989 | 39812897 | Laccase-4 OS=Arabidopsis thaliana GN=IRX12 PE=2 SV=2                                                    |
| <i>jg6025</i> | RGI | 4 | 40105545 | 40108927 | 39812897 | Transcription factor DIVARICATA OS=Antirrhinum majus<br>GN=DIVARICATA PE=2 SV=1                         |
| <i>jg6011</i> | RGI | 4 | 39892075 | 39892784 | 40188515 | NA                                                                                                      |
| <i>jg6012</i> | RGI | 4 | 39966830 | 39971381 | 40188515 | Pentatricopeptide repeat-containing protein At3g09060 OS=Arabidopsis<br>thaliana GN=At3g09060 PE=2 SV=1 |
| <i>jg6013</i> | RGI | 4 | 39966830 | 39971381 | 40188515 | Pentatricopeptide repeat-containing protein At3g09060 OS=Arabidopsis<br>thaliana GN=At3g09060 PE=2 SV=1 |
| <i>jg6014</i> | RGI | 4 | 39980082 | 40000419 | 40188515 | NA                                                                                                      |
| <i>jg6015</i> | RGI | 4 | 39999004 | 40000419 | 40188515 | NA                                                                                                      |
| <i>jg6016</i> | RGI | 4 | 40003722 | 40004879 | 40188515 | NA                                                                                                      |
| <i>jg6017</i> | RGI | 4 | 40005207 | 40008450 | 40188515 | Protein NRT1/ PTR FAMILY 8.1 OS=Arabidopsis thaliana GN=NPF8.1<br>PE=1 SV=1                             |
| <i>jg6018</i> | RGI | 4 | 40020307 | 40022696 | 40188515 | NA                                                                                                      |
| <i>jg6019</i> | RGI | 4 | 40024774 | 40024974 | 40188515 | NA                                                                                                      |
| <i>jg6020</i> | RGI | 4 | 40034564 | 40035151 | 40188515 | NA                                                                                                      |
| <i>jg6021</i> | RGI | 4 | 40039665 | 40052665 | 40188515 | NA                                                                                                      |
| <i>jg6022</i> | RGI | 4 | 40061826 | 40062026 | 40188515 | NA                                                                                                      |
| <i>jg6023</i> | RGI | 4 | 40070325 | 40071415 | 40188515 | NA                                                                                                      |
| <i>jg6024</i> | RGI | 4 | 40099842 | 40102989 | 40188515 | Laccase-4 OS=Arabidopsis thaliana GN=IRX12 PE=2 SV=2                                                    |
| <i>jg6025</i> | RGI | 4 | 40105545 | 40108927 | 40188515 | Transcription factor DIVARICATA OS=Antirrhinum majus<br>GN=DIVARICATA PE=2 SV=1                         |
| <i>jg6026</i> | RGI | 4 | 40115462 | 40116240 | 40188515 | NA                                                                                                      |
| <i>jg6027</i> | RGI | 4 | 40141497 | 40147459 | 40188515 | SulfoquinAvosyl transferase SQD2 OS=Arabidopsis thaliana GN=SQD2<br>PE=1 SV=1                           |
| <i>jg6028</i> | RGI | 4 | 40154596 | 40156182 | 40188515 | NA                                                                                                      |
| <i>jg6029</i> | RGI | 4 | 40180207 | 40182140 | 40188515 | NA                                                                                                      |
| <i>jg6030</i> | RGI | 4 | 40184370 | 40199700 | 40188515 | NA                                                                                                      |
| <i>jg6031</i> | RGI | 4 | 40205864 | 40206707 | 40188515 | NA                                                                                                      |
| <i>jg6032</i> | RGI | 4 | 40289106 | 40290388 | 40188515 | NA                                                                                                      |
| <i>jg6033</i> | RGI | 4 | 40325815 | 40329549 | 40188515 | Glycerol-3-phosphate 2-O-acyltransferase 6 OS=Arabidopsis thaliana<br>GN=GPAT6 PE=1 SV=1                |
| <i>jg6034</i> | RGI | 4 | 40332130 | 40333237 | 40188515 | NA                                                                                                      |
| <i>jg6035</i> | RGI | 4 | 40338932 | 40339345 | 40188515 | NA                                                                                                      |

|                |     |   |          |          |          |                                                                                                                        |
|----------------|-----|---|----------|----------|----------|------------------------------------------------------------------------------------------------------------------------|
| <i>jpg6036</i> | RGI | 4 | 40339640 | 40339921 | 40188515 | NA                                                                                                                     |
| <i>jpg6037</i> | RGI | 4 | 40413557 | 40417306 | 40188515 | Probable leucine-rich repeat receptor-like protein kinase At1g35710<br>OS=Arabidopsis thaliana GN=At1g35710 PE=2 SV=1  |
| <i>jpg6038</i> | RGI | 4 | 40422818 | 40423862 | 40188515 | NA                                                                                                                     |
| <i>jpg6039</i> | RGI | 4 | 40425443 | 40431745 | 40188515 | NA                                                                                                                     |
| <i>jpg6040</i> | RGI | 4 | 40491547 | 40493490 | 40188515 | NA                                                                                                                     |
| <i>jpg6041</i> | RGI | 4 | 40504020 | 40506676 | 40188515 | NA                                                                                                                     |
| <i>jpg6042</i> | RGI | 4 | 40517490 | 40519079 | 40188515 | Probable aquaporin PIP1-4 OS=Arabidopsis thaliana GN=PIP1.4 PE=1<br>SV=1                                               |
| <i>jpg6043</i> | RGI | 4 | 40531501 | 40533447 | 40188515 | NA                                                                                                                     |
| <i>jpg6044</i> | RGI | 4 | 40532093 | 40538658 | 40188515 | NA                                                                                                                     |
| <i>jpg6063</i> | RGI | 4 | 40765263 | 40766961 | 41058948 | NA                                                                                                                     |
| <i>jpg6064</i> | RGI | 4 | 40768638 | 40770101 | 41058948 | Uncharacterized protein At4g19900 OS=Arabidopsis thaliana<br>GN=At4g19900 PE=2 SV=1                                    |
| <i>jpg6065</i> | RGI | 4 | 40772857 | 40773647 | 41058948 | NA                                                                                                                     |
| <i>jpg6066</i> | RGI | 4 | 40784515 | 40788180 | 41058948 | Probable LRR receptor-like serine/threonine-protein kinase At3g47570<br>OS=Arabidopsis thaliana GN=At3g47570 PE=2 SV=1 |
| <i>jpg6067</i> | RGI | 4 | 40796250 | 40797571 | 41058948 | NA                                                                                                                     |
| <i>jpg6068</i> | RGI | 4 | 40797608 | 40798849 | 41058948 | NA                                                                                                                     |
| <i>jpg6069</i> | RGI | 4 | 40808131 | 40809700 | 41058948 | NA                                                                                                                     |
| <i>jpg6071</i> | RGI | 4 | 40823689 | 40830788 | 41058948 | RNA polymerase II C-terminal domain phosphatase-like 2<br>OS=Arabidopsis thaliana GN=CPL2 PE=1 SV=3                    |
| <i>jpg6072</i> | RGI | 4 | 40838514 | 40844344 | 41058948 | Cold-responsive protein kinase 1 OS=Arabidopsis thaliana GN=CRPK1<br>PE=1 SV=1                                         |
| <i>jpg6073</i> | RGI | 4 | 40843379 | 40846476 | 41058948 | NA                                                                                                                     |
| <i>jpg6074</i> | RGI | 4 | 40861816 | 40866027 | 41058948 | NA                                                                                                                     |
| <i>jpg6075</i> | RGI | 4 | 40876395 | 40880592 | 41058948 | Protein yippee-like OS=Solanum tuberosum PE=2 SV=1                                                                     |
| <i>jpg6076</i> | RGI | 4 | 40877756 | 40880592 | 41058948 | Protein yippee-like OS=Solanum tuberosum PE=2 SV=1                                                                     |
| <i>jpg6077</i> | RGI | 4 | 40901531 | 40905097 | 41058948 | Probable LRR receptor-like serine/threonine-protein kinase At3g47570<br>OS=Arabidopsis thaliana GN=At3g47570 PE=2 SV=1 |
| <i>jpg6079</i> | RGI | 4 | 40927332 | 40932374 | 41058948 | E3 ubiquitin-protein ligase AIRP2 OS=Arabidopsis thaliana GN=AIRP2<br>PE=1 SV=1                                        |
| <i>jpg6080</i> | RGI | 4 | 40959284 | 40965885 | 41058948 | Protein root UVB sensitive 5 OS=Arabidopsis thaliana GN=RUS5 PE=2<br>SV=1                                              |

|               |     |   |          |          |          |                                                                                                            |
|---------------|-----|---|----------|----------|----------|------------------------------------------------------------------------------------------------------------|
| <i>jg6081</i> | RGI | 4 | 40995214 | 41005051 | 41058948 | Alcohol dehydrogenase-like 3 OS=Arabidopsis thaliana GN=At1g32780<br>PE=2 SV=1                             |
| <i>jg6082</i> | RGI | 4 | 41008549 | 41008794 | 41058948 | NA                                                                                                         |
| <i>jg6083</i> | RGI | 4 | 41011176 | 41015150 | 41058948 | Probable diaminopimelate decarboxylase, chloroplastic OS=Oryza<br>sativa subsp. japonica GN=LYSA PE=2 SV=1 |
| <i>jg6084</i> | RGI | 4 | 41021178 | 41022520 | 41058948 | NA                                                                                                         |
| <i>jg6085</i> | RGI | 4 | 41032062 | 41036402 | 41058948 | Thylakoid ADP,ATP carrier protein, chloroplastic OS=Arabidopsis<br>thaliana GN=TAAC PE=1 SV=1              |
| <i>jg6086</i> | RGI | 4 | 41041546 | 41049812 | 41058948 | Vacuolar cation/proton exchanger 3 OS=Arabidopsis thaliana GN=CAX3<br>PE=1 SV=1                            |
| <i>jg6087</i> | RGI | 4 | 41058322 | 41058648 | 41058948 | NA                                                                                                         |
| <i>jg6088</i> | RGI | 4 | 41095487 | 41100483 | 41058948 | LIMR family protein At5g01460 OS=Arabidopsis thaliana<br>GN=At5g01460 PE=2 SV=1                            |
| <i>jg6089</i> | RGI | 4 | 41126953 | 41128921 | 41058948 | GDSL esterase/lipase CPRD49 OS=Arabidopsis thaliana GN=CPRD49<br>PE=2 SV=1                                 |
| <i>jg6090</i> | RGI | 4 | 41135313 | 41139653 | 41058948 | NA                                                                                                         |
| <i>jg6091</i> | RGI | 4 | 41153341 | 41155249 | 41058948 | NA                                                                                                         |
| <i>jg6092</i> | RGI | 4 | 41164151 | 41166442 | 41058948 | NA                                                                                                         |
| <i>jg6093</i> | RGI | 4 | 41177103 | 41179061 | 41058948 | Zeatin O-glucosyltransferase OS=Phaseolus lunatus GN=ZOG1 PE=2<br>SV=1                                     |
| <i>jg6094</i> | RGI | 4 | 41177103 | 41179298 | 41058948 | Zeatin O-glucosyltransferase OS=Phaseolus lunatus GN=ZOG1 PE=2<br>SV=1                                     |
| <i>jg6096</i> | RGI | 4 | 41233753 | 41234557 | 41058948 | NA                                                                                                         |
| <i>jg6097</i> | RGI | 4 | 41245430 | 41252912 | 41058948 | NA                                                                                                         |
| <i>jg6098</i> | RGI | 4 | 41253875 | 41256108 | 41058948 | NA                                                                                                         |
| <i>jg6099</i> | RGI | 4 | 41264138 | 41266101 | 41058948 | NA                                                                                                         |
| <i>jg6100</i> | RGI | 4 | 41270086 | 41272092 | 41058948 | GDSL esterase/lipase CPRD49 OS=Arabidopsis thaliana GN=CPRD49<br>PE=2 SV=1                                 |
| <i>jg6101</i> | RGI | 4 | 41283988 | 41285975 | 41058948 | Probable protein phosphatase 2C 73 OS=Arabidopsis thaliana<br>GN=PPC6-7 PE=2 SV=1                          |
| <i>jg6102</i> | RGI | 4 | 41286141 | 41289689 | 41058948 | GDSL esterase/lipase CPRD49 OS=Arabidopsis thaliana GN=CPRD49<br>PE=2 SV=1                                 |
| <i>jg6103</i> | RGI | 4 | 41319150 | 41321262 | 41058948 | NA                                                                                                         |
| <i>jg6104</i> | RGI | 4 | 41332599 | 41332883 | 41058948 | NA                                                                                                         |

|                |     |   |          |          |          |                                                                                                        |
|----------------|-----|---|----------|----------|----------|--------------------------------------------------------------------------------------------------------|
| <i>jg6105</i>  | RGI | 4 | 41353001 | 41353216 | 41058948 | NA                                                                                                     |
| <i>jg6106</i>  | RGI | 4 | 41353289 | 41353504 | 41058948 | NA                                                                                                     |
| <i>jg6107</i>  | RGI | 4 | 41357006 | 41357461 | 41058948 | NA                                                                                                     |
| <i>jg23079</i> | RGI | 7 | 36929063 | 36929597 | 37173579 | NA                                                                                                     |
| <i>jg23080</i> | RGI | 7 | 36937322 | 36940181 | 37173579 | Cyclin-D4-1 OS= <i>Oryza sativa</i> subsp. <i>japonica</i> GN=CYCD4-1 PE=2 SV=2                        |
| <i>jg23081</i> | RGI | 7 | 36943888 | 36944215 | 37173579 | NA                                                                                                     |
| <i>jg23082</i> | RGI | 7 | 36971381 | 36972712 | 37173579 | NA                                                                                                     |
| <i>jg23083</i> | RGI | 7 | 37010566 | 37011009 | 37173579 | NA                                                                                                     |
| <i>jg23084</i> | RGI | 7 | 37064499 | 37074698 | 37173579 | ATP-dependent 6-phosphofructokinase 5, chloroplastic OS= <i>Arabidopsis thaliana</i> GN=PFK5 PE=1 SV=1 |
| <i>jg23085</i> | RGI | 7 | 37099278 | 37099493 | 37173579 | NA                                                                                                     |
| <i>jg23086</i> | RGI | 7 | 37125853 | 37127827 | 37173579 | Zinc-finger homeodomain protein 1 OS= <i>Oryza sativa</i> subsp. <i>japonica</i> GN=ZHD1 PE=2 SV=1     |
| <i>jg23087</i> | RGI | 7 | 37131739 | 37132200 | 37173579 | NA                                                                                                     |
| <i>jg23088</i> | RGI | 7 | 37274253 | 37292312 | 37173579 | GLABRA2 expression modulator OS= <i>Arabidopsis thaliana</i> GN=GEM PE=1 SV=1                          |
| <i>jg23089</i> | RGI | 7 | 37308881 | 37312579 | 37173579 | NA                                                                                                     |
| <i>jg23090</i> | RGI | 7 | 37317312 | 37317992 | 37173579 | NA                                                                                                     |
| <i>jg23091</i> | RGI | 7 | 37392315 | 37397121 | 37173579 | NA                                                                                                     |
| <i>jg23092</i> | RGI | 7 | 37411613 | 37414941 | 37173579 | NA                                                                                                     |
| <i>jg23093</i> | RGI | 7 | 37433621 | 37434162 | 37173579 | NA                                                                                                     |
| <i>jg23094</i> | RGI | 7 | 37434212 | 37434838 | 37173579 | NA                                                                                                     |
| <i>jg23095</i> | RGI | 7 | 37455903 | 37459491 | 37173579 | BTB/POZ domain-containing protein At1g67900 OS= <i>Arabidopsis thaliana</i> GN=At1g67900 PE=1 SV=1     |
| <i>jg23096</i> | RGI | 7 | 37461266 | 37462433 | 37173579 | NA                                                                                                     |
| <i>jg23097</i> | RGI | 7 | 37464690 | 37471175 | 37173579 | NA                                                                                                     |
| <i>jg23989</i> | RGI | 7 | 55894774 | 55895812 | 56140780 | NA                                                                                                     |
| <i>jg23990</i> | RGI | 7 | 55906667 | 55910112 | 56140780 | NA                                                                                                     |
| <i>jg23991</i> | RGI | 7 | 55925869 | 55927591 | 56140780 | NA                                                                                                     |
| <i>jg23992</i> | RGI | 7 | 55957885 | 55958544 | 56140780 | NA                                                                                                     |
| <i>jg23993</i> | RGI | 7 | 55958748 | 55959249 | 56140780 | NA                                                                                                     |
| <i>jg23994</i> | RGI | 7 | 55974109 | 55976654 | 56140780 | NA                                                                                                     |
| <i>jg23995</i> | RGI | 7 | 56003258 | 56003899 | 56140780 | NA                                                                                                     |

|                |     |   |          |          |          |                                                                                            |
|----------------|-----|---|----------|----------|----------|--------------------------------------------------------------------------------------------|
| <i>jg23996</i> | RGI | 7 | 56037074 | 56037289 | 56140780 | NA                                                                                         |
| <i>jg23997</i> | RGI | 7 | 56056998 | 56057374 | 56140780 | NA                                                                                         |
| <i>jg23998</i> | RGI | 7 | 56068451 | 56070029 | 56140780 | NA                                                                                         |
| <i>jg23999</i> | RGI | 7 | 56122042 | 56125274 | 56140780 | NA                                                                                         |
| <i>jg24000</i> | RGI | 7 | 56166068 | 56171886 | 56140780 | NA                                                                                         |
| <i>jg24001</i> | RGI | 7 | 56177142 | 56186869 | 56140780 | Berberine bridge enzyme-like 23 OS=Arabidopsis thaliana<br>GN=At5g44360 PE=2 SV=1          |
| <i>jg24002</i> | RGI | 7 | 56230256 | 56247256 | 56140780 | NA                                                                                         |
| <i>jg24003</i> | RGI | 7 | 56274889 | 56276324 | 56140780 | NA                                                                                         |
| <i>jg24004</i> | RGI | 7 | 56292353 | 56292595 | 56140780 | NA                                                                                         |
| <i>jg24005</i> | RGI | 7 | 56307151 | 56310488 | 56140780 | NA                                                                                         |
| <i>jg24006</i> | RGI | 7 | 56379124 | 56380002 | 56140780 | NA                                                                                         |
| <i>jg24007</i> | RGI | 7 | 56388714 | 56389583 | 56140780 | NA                                                                                         |
| <i>jg24008</i> | RGI | 7 | 56390173 | 56392258 | 56140780 | NA                                                                                         |
| <i>jg24009</i> | RGI | 7 | 56392661 | 56393005 | 56140780 | NA                                                                                         |
| <i>jg24010</i> | RGI | 7 | 56394024 | 56394353 | 56140780 | NA                                                                                         |
| <i>jg24011</i> | RGI | 7 | 56394838 | 56395098 | 56140780 | NA                                                                                         |
| <i>jg24012</i> | RGI | 7 | 56395546 | 56395809 | 56140780 | NA                                                                                         |
| <i>jg24013</i> | RGI | 7 | 56409228 | 56411266 | 56140780 | NA                                                                                         |
| <i>jg24014</i> | RGI | 7 | 56411513 | 56412022 | 56140780 | NA                                                                                         |
| <i>jg24015</i> | RGI | 7 | 56427593 | 56428018 | 56140780 | NA                                                                                         |
| <i>jg24016</i> | RGI | 7 | 56428851 | 56431173 | 56140780 | E3 ubiquitin-protein ligase SINA-like 10 OS=Arabidopsis thaliana<br>GN=At5g37930 PE=2 SV=1 |
| <i>jg37444</i> | RGI | 8 | 22450530 | 22452580 | 22721042 | Transcription factor RAX2 OS=Arabidopsis thaliana GN=RAX2 PE=1<br>SV=1                     |
| <i>jg37445</i> | RGI | 8 | 22466778 | 22468373 | 22721042 | NA                                                                                         |
| <i>jg37446</i> | RGI | 8 | 22481840 | 22482175 | 22721042 | NA                                                                                         |
| <i>jg37447</i> | RGI | 8 | 22485480 | 22486123 | 22721042 | NA                                                                                         |
| <i>jg37448</i> | RGI | 8 | 22491342 | 22498568 | 22721042 | Protein PTST homolog 3, chloroplastic OS=Arabidopsis thaliana<br>GN=PTST PE=1 SV=1         |
| <i>jg37449</i> | RGI | 8 | 22501937 | 22503945 | 22721042 | NA                                                                                         |
| <i>jg37450</i> | RGI | 8 | 22506782 | 22507105 | 22721042 | NA                                                                                         |
| <i>jg37451</i> | RGI | 8 | 22518716 | 22522038 | 22721042 | NA                                                                                         |

|                |     |   |          |          |          |                                                                                                  |
|----------------|-----|---|----------|----------|----------|--------------------------------------------------------------------------------------------------|
| <i>jg37452</i> | RGI | 8 | 22518716 | 22519281 | 22721042 | CHD3-type chromatin-remodeling factor PICKLE OS=Arabidopsis thaliana GN=PKL PE=1 SV=1            |
| <i>jg37453</i> | RGI | 8 | 22527647 | 22528536 | 22721042 | NA                                                                                               |
| <i>jg37454</i> | RGI | 8 | 22540639 | 22541503 | 22721042 | NA                                                                                               |
| <i>jg37455</i> | RGI | 8 | 22545402 | 22547763 | 22721042 | S-adeNAsylmethionine synthase 1 OS=Vitis vinifera GN=METK1 PE=3 SV=1                             |
| <i>jg37456</i> | RGI | 8 | 22553600 | 22554135 | 22721042 | NA                                                                                               |
| <i>jg37457</i> | RGI | 8 | 22558772 | 22559080 | 22721042 | NA                                                                                               |
| <i>jg37458</i> | RGI | 8 | 22604406 | 22610034 | 22721042 | DEAD-box ATP-dependent RNA helicase 13 OS=Oryza sativa subsp. japonica GN=Os04g0510400 PE=2 SV=2 |
| <i>jg37459</i> | RGI | 8 | 22614577 | 22616172 | 22721042 | NA                                                                                               |
| <i>jg37460</i> | RGI | 8 | 22623460 | 22625838 | 22721042 | NA                                                                                               |
| <i>jg37461</i> | RGI | 8 | 22628177 | 22639969 | 22721042 | Transcription factor EMB1444 OS=Arabidopsis thaliana GN=EMB1444 PE=2 SV=1                        |
| <i>jg37462</i> | RGI | 8 | 22647478 | 22648311 | 22721042 | NA                                                                                               |
| <i>jg37463</i> | RGI | 8 | 22662093 | 22664415 | 22721042 | WAT1-related protein At4g08290 OS=Arabidopsis thaliana GN=At4g08290 PE=2 SV=1                    |
| <i>jg37464</i> | RGI | 8 | 22664499 | 22667822 | 22721042 | CDT1-like protein a, chloroplastic OS=Arabidopsis thaliana GN=CDT1A PE=1 SV=1                    |
| <i>jg37465</i> | RGI | 8 | 22673828 | 22674537 | 22721042 | NA                                                                                               |
| <i>jg37466</i> | RGI | 8 | 22679727 | 22679969 | 22721042 | NA                                                                                               |
| <i>jg37467</i> | RGI | 8 | 22680097 | 22680768 | 22721042 | NA                                                                                               |
| <i>jg37468</i> | RGI | 8 | 22700646 | 22708003 | 22721042 | Autophagy-related protein 9 OS=Arabidopsis thaliana GN=ATG9 PE=2 SV=1                            |
| <i>jg37469</i> | RGI | 8 | 22736538 | 22741080 | 22721042 | Protein KINESIN LIGHT CHAIN-RELATED 2 OS=Arabidopsis thaliana GN=KLCR2 PE=1 SV=1                 |
| <i>jg37470</i> | RGI | 8 | 22742015 | 22743922 | 22721042 | RING-H2 finger protein ATL1 OS=Arabidopsis thaliana GN=ATL1 PE=2 SV=1                            |
| <i>jg37471</i> | RGI | 8 | 22745172 | 22747045 | 22721042 | Protein DOWNY MILDEW RESISTANCE 6 OS=Arabidopsis thaliana GN=DMR6 PE=1 SV=1                      |
| <i>jg37472</i> | RGI | 8 | 22748189 | 22748639 | 22721042 | NA                                                                                               |
| <i>jg37473</i> | RGI | 8 | 22761271 | 22761588 | 22721042 | NA                                                                                               |
| <i>jg37474</i> | RGI | 8 | 22777947 | 22778630 | 22721042 | NA                                                                                               |
| <i>jg37475</i> | RGI | 8 | 22780368 | 22786226 | 22721042 | NA                                                                                               |



|                |     |   |          |          |          |                                                                                             |
|----------------|-----|---|----------|----------|----------|---------------------------------------------------------------------------------------------|
| <i>ig37476</i> | RGI | 8 | 22787164 | 22788495 | 22721042 | NA                                                                                          |
| <i>ig37477</i> | RGI | 8 | 22792512 | 22792934 | 22721042 | NA                                                                                          |
| <i>ig37478</i> | RGI | 8 | 22830846 | 22831435 | 22721042 | NA                                                                                          |
| <i>ig37479</i> | RGI | 8 | 22832761 | 22833405 | 22721042 | NA                                                                                          |
| <i>ig37480</i> | RGI | 8 | 22862209 | 22867132 | 22721042 | NA                                                                                          |
| <i>ig37481</i> | RGI | 8 | 22868351 | 22891133 | 22721042 | Structural maintenance of chromosomes protein 1 OS=Arabidopsis thaliana GN=SMC1 PE=2 SV=2   |
| <i>ig37482</i> | RGI | 8 | 22904664 | 22905200 | 22721042 | Probable methyltransferase PMT16 OS=Arabidopsis thaliana GN=At2g45750 PE=3 SV=1             |
| <i>ig37483</i> | RGI | 8 | 22914885 | 22915699 | 22721042 | Ethylene-responsive transcription factor 1B OS=Arabidopsis thaliana GN=ERF1B PE=1 SV=2      |
| <i>ig37484</i> | RGI | 8 | 22924908 | 22925703 | 22721042 | Ethylene-responsive transcription factor 1B OS=Arabidopsis thaliana GN=ERF1B PE=1 SV=2      |
| <i>ig37485</i> | RGI | 8 | 22946909 | 22947121 | 22721042 | NA                                                                                          |
| <i>ig37486</i> | RGI | 8 | 22955659 | 22955922 | 22721042 | NA                                                                                          |
| <i>ig37487</i> | RGI | 8 | 22962288 | 22962569 | 22721042 | NA                                                                                          |
| <i>ig37488</i> | RGI | 8 | 22963649 | 22966152 | 22721042 | NA                                                                                          |
| <i>ig37489</i> | RGI | 8 | 22981831 | 22982602 | 22721042 | Ethylene-responsive transcription factor 1B OS=Arabidopsis thaliana GN=ERF1B PE=1 SV=2      |
| <i>ig37490</i> | RGI | 8 | 23015889 | 23016273 | 22721042 | NA                                                                                          |
| <i>ig37491</i> | RGI | 8 | 23017787 | 23018368 | 22721042 | Ethylene-responsive transcription factor ERF098 OS=Arabidopsis thaliana GN=ERF098 PE=1 SV=1 |
| <i>ig38796</i> | RGI | 8 | 38211083 | 38215630 | 38508969 | Protein SIEVE ELEMENT OCCLUSION B OS=Arabidopsis thaliana GN=SEOB PE=1 SV=1                 |
| <i>ig38797</i> | RGI | 8 | 38220844 | 38221871 | 38508969 | Phosphoenolpyruvate carboxylase kinase 2 OS=Arabidopsis thaliana GN=PPCK2 PE=1 SV=2         |
| <i>ig38798</i> | RGI | 8 | 38223825 | 38225752 | 38508969 | NA                                                                                          |
| <i>ig38799</i> | RGI | 8 | 38229242 | 38229574 | 38508969 | NA                                                                                          |
| <i>ig38800</i> | RGI | 8 | 38232956 | 38233198 | 38508969 | NA                                                                                          |
| <i>ig38801</i> | RGI | 8 | 38234051 | 38235868 | 38508969 | Probable inorganic phosphate transporter 1-7 OS=Arabidopsis thaliana GN=PHT1-7 PE=2 SV=2    |
| <i>ig38802</i> | RGI | 8 | 38240211 | 38243869 | 38508969 | Inorganic phosphate transporter 1-4 OS=Arabidopsis thaliana GN=PHT1-4 PE=1 SV=1             |

|                |     |   |          |          |          |                                                                                                              |
|----------------|-----|---|----------|----------|----------|--------------------------------------------------------------------------------------------------------------|
| <i>ig38803</i> | RGI | 8 | 38256927 | 38261537 | 38508969 | Serine/threonine-protein phosphatase PP1 OS= <i>Oryza sativa</i> subsp. japonica GN=Os03g0268000 PE=2 SV=2   |
| <i>ig38804</i> | RGI | 8 | 38263487 | 38266384 | 38508969 | NA                                                                                                           |
| <i>ig38805</i> | RGI | 8 | 38270134 | 38271892 | 38508969 | NA                                                                                                           |
| <i>ig38806</i> | RGI | 8 | 38282880 | 38283092 | 38508969 | NA                                                                                                           |
| <i>ig38807</i> | RGI | 8 | 38285451 | 38287070 | 38508969 | Ethylene-responsive transcription factor 1B OS= <i>Arabidopsis thaliana</i> GN=ERF1B PE=1 SV=2               |
| <i>ig38808</i> | RGI | 8 | 38318963 | 38319647 | 38508969 | Ethylene-responsive transcription factor ERF098 OS= <i>Arabidopsis thaliana</i> GN=ERF098 PE=1 SV=1          |
| <i>ig38809</i> | RGI | 8 | 38335754 | 38336793 | 38508969 | Ethylene-responsive transcription factor ERF096 OS= <i>Arabidopsis thaliana</i> GN=ERF096 PE=1 SV=1          |
| <i>ig38810</i> | RGI | 8 | 38345483 | 38347534 | 38508969 | RING-H2 finger protein ATL16 OS= <i>Arabidopsis thaliana</i> GN=ATL16 PE=2 SV=1                              |
| <i>ig38811</i> | RGI | 8 | 38351968 | 38355557 | 38508969 | Electron transfer flavoprotein subunit beta, mitochondrial OS= <i>Arabidopsis thaliana</i> GN=ETFB PE=1 SV=1 |
| <i>ig38812</i> | RGI | 8 | 38360348 | 38362589 | 38508969 | WAT1-related protein At5g07050 OS= <i>Arabidopsis thaliana</i> GN=At5g07050 PE=2 SV=1                        |
| <i>ig38813</i> | RGI | 8 | 38370661 | 38373861 | 38508969 | CASP-like protein 5B3 OS= <i>Arabidopsis thaliana</i> GN=At3g23200 PE=2 SV=1                                 |
| <i>ig38814</i> | RGI | 8 | 38385078 | 38397040 | 38508969 | Probable protein phosphatase 2C 22 OS= <i>Arabidopsis thaliana</i> GN=At2g25620 PE=1 SV=1                    |
| <i>ig38815</i> | RGI | 8 | 38385078 | 38397040 | 38508969 | Probable protein phosphatase 2C 22 OS= <i>Arabidopsis thaliana</i> GN=At2g25620 PE=1 SV=1                    |
| <i>ig38816</i> | RGI | 8 | 38385078 | 38397040 | 38508969 | Homogentisate phytyltransferase 1, chloroplastic OS= <i>Arabidopsis thaliana</i> GN=HPT1 PE=1 SV=1           |
| <i>ig38817</i> | RGI | 8 | 38401723 | 38404704 | 38508969 | CASP-like protein 5B3 OS= <i>Arabidopsis thaliana</i> GN=At3g23200 PE=2 SV=1                                 |
| <i>ig38818</i> | RGI | 8 | 38409519 | 38410064 | 38508969 | NA                                                                                                           |
| <i>ig38819</i> | RGI | 8 | 38412682 | 38415116 | 38508969 | NA                                                                                                           |
| <i>ig38820</i> | RGI | 8 | 38415468 | 38418459 | 38508969 | NA                                                                                                           |
| <i>ig38821</i> | RGI | 8 | 38424292 | 38436805 | 38508969 | Actin-related protein 9 OS= <i>Arabidopsis thaliana</i> GN=ARP9 PE=2 SV=1                                    |
| <i>ig38822</i> | RGI | 8 | 38443067 | 38444456 | 38508969 | Uncharacterized protein At4g14450, chloroplastic OS= <i>Arabidopsis thaliana</i> GN=At4g14450 PE=2 SV=1      |

|                |     |   |          |          |          |                                                                                                        |
|----------------|-----|---|----------|----------|----------|--------------------------------------------------------------------------------------------------------|
| <i>jg38823</i> | RGI | 8 | 38451005 | 38453594 | 38508969 | NA                                                                                                     |
| <i>jg38824</i> | RGI | 8 | 38460605 | 38465702 | 38508969 | NA                                                                                                     |
| <i>jg38825</i> | RGI | 8 | 38475774 | 38478195 | 38508969 | NA                                                                                                     |
| <i>jg38826</i> | RGI | 8 | 38484012 | 38488394 | 38508969 | Ethylene receptor 2 OS=Arabidopsis thaliana GN=ETR2 PE=1 SV=2                                          |
| <i>jg38827</i> | RGI | 8 | 38484012 | 38488394 | 38508969 | Ethylene receptor 2 OS=Arabidopsis thaliana GN=ETR2 PE=1 SV=2                                          |
| <i>jg38828</i> | RGI | 8 | 38519079 | 38536147 | 38508969 | TNF receptor-associated factor homolog 1b OS=Arabidopsis thaliana<br>GN=TRAF1B PE=1 SV=1               |
| <i>jg38829</i> | RGI | 8 | 38542672 | 38543200 | 38508969 | NA                                                                                                     |
| <i>jg38830</i> | RGI | 8 | 38547898 | 38548690 | 38508969 | NA                                                                                                     |
| <i>jg38831</i> | RGI | 8 | 38552747 | 38553439 | 38508969 | NA                                                                                                     |
| <i>jg38832</i> | RGI | 8 | 38556025 | 38558807 | 38508969 | Protein PIN-LIKES 3 OS=Arabidopsis thaliana GN=PILS3 PE=2 SV=1                                         |
| <i>jg38833</i> | RGI | 8 | 38559833 | 38564522 | 38508969 | Protein unc-13 homolog OS=Arabidopsis thaliana GN=PATROL1 PE=2<br>SV=1                                 |
| <i>jg38834</i> | RGI | 8 | 38565333 | 38569148 | 38508969 | Cellulose synthase-like protein G2 OS=Arabidopsis thaliana GN=CSLG2<br>PE=2 SV=1                       |
| <i>jg38836</i> | RGI | 8 | 38587802 | 38591769 | 38508969 | Heterogeneous nuclear ribonucleoprotein 1 OS=Arabidopsis thaliana<br>GN=RNP1 PE=1 SV=1                 |
| <i>jg38837</i> | RGI | 8 | 38596742 | 38599804 | 38508969 | NA                                                                                                     |
| <i>jg38838</i> | RGI | 8 | 38596742 | 38601103 | 38508969 | NA                                                                                                     |
| <i>jg38839</i> | RGI | 8 | 38606024 | 38609038 | 38508969 | NA                                                                                                     |
| <i>jg38840</i> | RGI | 8 | 38619215 | 38620814 | 38508969 | NA                                                                                                     |
| <i>jg38841</i> | RGI | 8 | 38627675 | 38631134 | 38508969 | Uncharacterized protein At5g64816 OS=Arabidopsis thaliana<br>GN=At5g64816 PE=2 SV=1                    |
| <i>jg38842</i> | RGI | 8 | 38632540 | 38636564 | 38508969 | NA                                                                                                     |
| <i>jg38843</i> | RGI | 8 | 38632540 | 38637004 | 38508969 | NA                                                                                                     |
| <i>jg38844</i> | RGI | 8 | 38642650 | 38645115 | 38508969 | DELLA protein GAI OS=Arabidopsis thaliana GN=GAI PE=1 SV=1                                             |
| <i>jg38845</i> | RGI | 8 | 38645265 | 38649263 | 38508969 | Zinc finger protein CONSTANS-LIKE 4 OS=Arabidopsis thaliana<br>GN=COL4 PE=2 SV=2                       |
| <i>jg38847</i> | RGI | 8 | 38667380 | 38669497 | 38508969 | Cysteine-rich repeat secretory protein 3 OS=Arabidopsis thaliana<br>GN=CRRSP3 PE=1 SV=1                |
| <i>jg38848</i> | RGI | 8 | 38671438 | 38675097 | 38508969 | Pentatricopeptide repeat-containing protein At1g25360 OS=Arabidopsis<br>thaliana GN=PCMP-H74 PE=2 SV=1 |
| <i>jg38849</i> | RGI | 8 | 38671866 | 38675097 | 38508969 | Pentatricopeptide repeat-containing protein At1g25360 OS=Arabidopsis<br>thaliana GN=PCMP-H74 PE=2 SV=1 |

|                |     |   |          |          |          |                                                                                                                            |
|----------------|-----|---|----------|----------|----------|----------------------------------------------------------------------------------------------------------------------------|
| <i>ig38850</i> | RGI | 8 | 38675833 | 38679464 | 38508969 | NA                                                                                                                         |
| <i>ig38852</i> | RGI | 8 | 38688182 | 38692167 | 38508969 | NA                                                                                                                         |
| <i>ig38853</i> | RGI | 8 | 38692628 | 38695638 | 38508969 | 3-isopropylmalate dehydratase large subunit, chloroplastic<br>OS=Arabidopsis thaliana GN=IIL1 PE=1 SV=1                    |
| <i>ig38854</i> | RGI | 8 | 38692628 | 38698132 | 38508969 | 3-isopropylmalate dehydratase large subunit, chloroplastic<br>OS=Arabidopsis thaliana GN=IIL1 PE=1 SV=1                    |
| <i>ig38855</i> | RGI | 8 | 38692628 | 38698648 | 38508969 | 3-isopropylmalate dehydratase large subunit, chloroplastic<br>OS=Arabidopsis thaliana GN=IIL1 PE=1 SV=1                    |
| <i>ig38856</i> | RGI | 8 | 38700752 | 38704055 | 38508969 | NA                                                                                                                         |
| <i>ig38857</i> | RGI | 8 | 38703960 | 38706981 | 38508969 | NA                                                                                                                         |
| <i>ig38858</i> | RGI | 8 | 38709716 | 38710202 | 38508969 | Ripening-related protein grip22 OS=Vitis vinifera GN=grip22 PE=2 SV=1                                                      |
| <i>ig38859</i> | RGI | 8 | 38712719 | 38713072 | 38508969 | NA                                                                                                                         |
| <i>ig38860</i> | RGI | 8 | 38715907 | 38716377 | 38508969 | NA                                                                                                                         |
| <i>ig38861</i> | RGI | 8 | 38727202 | 38727709 | 38508969 | NA                                                                                                                         |
| <i>ig38862</i> | RGI | 8 | 38727512 | 38728235 | 38508969 | NA                                                                                                                         |
| <i>ig38863</i> | RGI | 8 | 38732999 | 38734087 | 38508969 | Transcription factor MYB2 OS=Oryza sativa subsp. japonica GN=MYB2<br>PE=2 SV=1                                             |
| <i>ig38864</i> | RGI | 8 | 38738756 | 38741468 | 38508969 | Pentatricopeptide repeat-containing protein At3g57430, chloroplastic<br>OS=Arabidopsis thaliana GN=PCMP-H81 PE=2 SV=2      |
| <i>ig38865</i> | RGI | 8 | 38739028 | 38741468 | 38508969 | Pentatricopeptide repeat-containing protein At3g57430, chloroplastic<br>OS=Arabidopsis thaliana GN=PCMP-H81 PE=2 SV=2      |
| <i>ig38866</i> | RGI | 8 | 38747365 | 38751510 | 38508969 | Haloacid dehalogenase-like hydrolase domain-containing protein<br>At2g33255 OS=Arabidopsis thaliana GN=At2g33255 PE=1 SV=1 |
| <i>ig38867</i> | RGI | 8 | 38756025 | 38762048 | 38508969 | Carboxyl-terminal-processing peptidase 2, chloroplastic<br>OS=Arabidopsis thaliana GN=CTPA2 PE=1 SV=1                      |
| <i>ig38868</i> | RGI | 8 | 38762780 | 38769971 | 38508969 | Polyadenylate-binding protein 1 OS=Arabidopsis thaliana GN=PABN1<br>PE=1 SV=1                                              |
| <i>ig38869</i> | RGI | 8 | 38783186 | 38786052 | 38508969 | Cyclin-dependent kinase inhibitor 3 OS=Arabidopsis thaliana GN=KRP3<br>PE=1 SV=1                                           |
| <i>ig38870</i> | RGI | 8 | 38793363 | 38798063 | 38508969 | NA                                                                                                                         |
| <i>ig38872</i> | RGI | 8 | 38809742 | 38831741 | 38508969 | ATP-dependent DNA helicase SRS2-like protein At4g25120<br>OS=Arabidopsis thaliana GN=SRS2 PE=1 SV=1                        |

|                |     |    |          |          |          |                                                                                                              |
|----------------|-----|----|----------|----------|----------|--------------------------------------------------------------------------------------------------------------|
| <i>jg32966</i> | RGI | 10 | 33092650 | 33094965 | 33340353 | E3 ubiquitin-protein ligase RZF1 OS=Arabidopsis thaliana GN=RZF1<br>PE=1 SV=1                                |
| <i>jg32967</i> | RGI | 10 | 33095142 | 33095527 | 33340353 | NA                                                                                                           |
| <i>jg32968</i> | RGI | 10 | 33120098 | 33122594 | 33340353 | NA                                                                                                           |
| <i>jg32969</i> | RGI | 10 | 33145691 | 33148538 | 33340353 | NA                                                                                                           |
| <i>jg32970</i> | RGI | 10 | 33153738 | 33154112 | 33340353 | NA                                                                                                           |
| <i>jg32971</i> | RGI | 10 | 33194573 | 33196760 | 33340353 | NA                                                                                                           |
| <i>jg32972</i> | RGI | 10 | 33197649 | 33212008 | 33340353 | Proline-rich receptor-like protein kinase PERK15 OS=Arabidopsis<br>thaliana GN=PERK15 PE=2 SV=1              |
| <i>jg32973</i> | RGI | 10 | 33220622 | 33223211 | 33340353 | NA                                                                                                           |
| <i>jg32974</i> | RGI | 10 | 33239060 | 33240560 | 33340353 | Zinc finger protein ZAT2 OS=Arabidopsis thaliana GN=ZAT2 PE=1<br>SV=1                                        |
| <i>jg32975</i> | RGI | 10 | 33262755 | 33263068 | 33340353 | NA                                                                                                           |
| <i>jg32976</i> | RGI | 10 | 33296274 | 33296916 | 33340353 | NA                                                                                                           |
| <i>jg32977</i> | RGI | 10 | 33330470 | 33330877 | 33340353 | NA                                                                                                           |
| <i>jg32978</i> | RGI | 10 | 33338372 | 33339160 | 33340353 | NA                                                                                                           |
| <i>jg32979</i> | RGI | 10 | 33354249 | 33357312 | 33340353 | NA                                                                                                           |
| <i>jg32980</i> | RGI | 10 | 33379807 | 33380127 | 33340353 | NA                                                                                                           |
| <i>jg32981</i> | RGI | 10 | 33438056 | 33439622 | 33340353 | NA                                                                                                           |
| <i>jg32982</i> | RGI | 10 | 33498519 | 33514201 | 33340353 | NA                                                                                                           |
| <i>jg32983</i> | RGI | 10 | 33537255 | 33538090 | 33340353 | NA                                                                                                           |
| <i>jg32984</i> | RGI | 10 | 33555228 | 33556362 | 33340353 | Cellulose synthase A catalytic subunit 7 [UDP-forming] OS=Oryza sativa<br>subsp. japonica GN=CESA7 PE=2 SV=1 |
| <i>jg32985</i> | RGI | 10 | 33556635 | 33609389 | 33340353 | Nudix hydrolase 3 OS=Arabidopsis thaliana GN=NUDT3 PE=1 SV=1                                                 |
| <i>jg32986</i> | RGI | 10 | 33619005 | 33623636 | 33340353 | FlavoNAid 3'-hydroxylase 2 OS=Petunia hybrida<br>GN=CYP75A3 PE=2 SV=1                                        |

---
