# Supplementary material for: Integration of GWAS and RNA-Seq Analysis to Identify SNPs and Candidate Genes Associated with Alkali Stress Tolerance at the Germination Stage in Mung Bean
Source: MDPI journal article supplement (doi:10.3390/genes14061294), 2023-06-19
Supplement: s1 [file s1]

**Table S6.** Gene Ontology (GO) analysis for 2565 DEGs.

| Category | GOID       | Description                               | Gene Ratio | Bg Ratio | P value     | Padj        | Gene ID                                                                                                                                                                                                                                                                                                                                                                     |
|----------|------------|-------------------------------------------|------------|----------|-------------|-------------|-----------------------------------------------------------------------------------------------------------------------------------------------------------------------------------------------------------------------------------------------------------------------------------------------------------------------------------------------------------------------------|
| BP       | GO:0006979 | response to oxidative stress              | 21/655     | 80/6148  | 6.33E-05    | 0.012066932 | novel.229/jg16891/jg31038/novel.230/jg8118/novel.454/novel.737/novel.261/novel.116/jg9023/jg20275/jg11952/jg38691/jg33679/jg31699/novel.85/jg2948/jg30160/jg3461/jg38233/jg4794                                                                                                                                                                                             |
| BP       | GO:0071554 | cell wall organization or biogenesis      | 19/655     | 69/6148  | 6.95E-05    | 0.012066932 | jg34074/jg1307/jg14987/jg29753/jg14986/jg21946/jg38108/jg12654/jg1316/jg3376/jg38109/jg3375/jg21947/jg21321/jg31535/jg3374/jg26874/jg33498/jg21951                                                                                                                                                                                                                          |
| BP       | GO:0006950 | response to stress                        | 45/655     | 242/6148 | 0.000112876 | 0.012066932 | jg20016/jg20015/jg24134/jg24133/novel.229/jg16891/jg24137/jg31038/novel.230/jg8118/novel.454/novel.737/jg29637/novel.261/novel.116/jg10452/jg20017/jg17863/jg9023/jg20275/jg39227/jg12934/jg25997/jg24420/jg39848/jg3030/jg11952/jg38077/jg8783/jg38691/jg4986/jg33679/jg31699/novel.85/jg34122/jg2948/jg20013/jg38775/jg30160/jg8288/jg20011/jg3461/jg27441/jg38233/jg4794 |
| BP       | GO:0006026 | aminoglycan catabolic process             | 6/655      | 11/6148  | 0.000412545 | 0.012066932 | jg34074/jg29753/jg21946/jg12654/jg21947/jg21951                                                                                                                                                                                                                                                                                                                             |
| BP       | GO:0006030 | chitin metabolic process                  | 6/655      | 11/6148  | 0.000412545 | 0.012066932 | jg34074/jg29753/jg21946/jg12654/jg21947/jg21951                                                                                                                                                                                                                                                                                                                             |
| BP       | GO:0006032 | chitin catabolic process                  | 6/655      | 11/6148  | 0.000412545 | 0.012066932 | jg34074/jg29753/jg21946/jg12654/jg21947/jg21951                                                                                                                                                                                                                                                                                                                             |
| BP       | GO:0006040 | amino sugar metabolic process             | 6/655      | 11/6148  | 0.000412545 | 0.012066932 | jg34074/jg29753/jg21946/jg12654/jg21947/jg21951                                                                                                                                                                                                                                                                                                                             |
| BP       | GO:0016998 | cell wall macromolecule catabolic process | 6/655      | 11/6148  | 0.000412545 | 0.012066932 | jg34074/jg29753/jg21946/jg12654/jg21947/jg21951                                                                                                                                                                                                                                                                                                                             |
| BP       | GO:0044036 | cell wall macromolecule metabolic process | 6/655      | 11/6148  | 0.000412545 | 0.012066932 | jg34074/jg29753/jg21946/jg12654/jg21947/jg21951                                                                                                                                                                                                                                                                                                                             |

|    |            |                                                         |        |         |             |             |                                                                                                                                                                                                |
|----|------------|---------------------------------------------------------|--------|---------|-------------|-------------|------------------------------------------------------------------------------------------------------------------------------------------------------------------------------------------------|
| BP | GO:0046348 | amino sugar catabolic process                           | 6/655  | 11/6148 | 0.000412545 | 0.012066932 | jg34074/jg29753/jg21946/jg12654/jg21947/jg21951                                                                                                                                                |
| BP | GO:1901071 | glucosamine-containing compound metabolic process       | 6/655  | 11/6148 | 0.000412545 | 0.012066932 | jg34074/jg29753/jg21946/jg12654/jg21947/jg21951                                                                                                                                                |
| BP | GO:1901072 | glucosamine-containing compound catabolic process       | 6/655  | 11/6148 | 0.000412545 | 0.012066932 | jg34074/jg29753/jg21946/jg12654/jg21947/jg21951                                                                                                                                                |
| BP | GO:0009607 | response to biotic stimulus                             | 10/655 | 31/6148 | 0.00097141  | 0.026228074 | jg20016/jg20015/jg24134/jg24133/jg24137/jg10452/jg20017/jg25997/jg20013/jg20011                                                                                                                |
| BP | GO:0006952 | defense response                                        | 13/655 | 50/6148 | 0.0017141   | 0.042974939 | jg20016/jg20015/jg24134/jg24133/jg24137/jg10452/jg20017/jg25997/jg3030/jg34122/jg20013/jg20011/jg27441                                                                                         |
| BP | GO:0006022 | aminoglycan metabolic process                           | 6/655  | 14/6148 | 0.002024305 | 0.044408181 | jg34074/jg29753/jg21946/jg12654/jg21947/jg21951                                                                                                                                                |
| BP | GO:0042737 | drug catabolic process                                  | 6/655  | 14/6148 | 0.002024305 | 0.044408181 | jg34074/jg29753/jg21946/jg12654/jg21947/jg21951                                                                                                                                                |
| MF | GO:0004601 | peroxidase activity                                     | 23/960 | 86/9398 | 1.09E-05    | 0.001972045 | jg5488/novel.229/jg16891/jg31038/novel.230/jg8118/novel.454/novel.737/novel.261/novel.116/jg29555/jg9023/jg20275/jg11952/jg38691/jg33679/jg31699/novel.85/jg2948/jg30160/jg3461/jg38233/jg4794 |
| MF | GO:0016684 | oxidoreductase activity, acting on peroxide as acceptor | 23/960 | 88/9398 | 1.65E-05    | 0.001972045 | jg5488/novel.229/jg16891/jg31038/novel.230/jg8118/novel.454/novel.737/novel.261/novel.116/jg29555/jg9023/jg20275/jg11952/jg38691/jg33679/jg31699/novel.85/jg2948/jg30160/jg3461/jg38233/jg4794 |
| MF | GO:0016209 | antioxidant activity                                    | 23/960 | 93/9398 | 4.31E-05    | 0.003430342 | jg5488/novel.229/jg16891/jg31038/novel.230/jg8118/novel.454/novel.737/novel.261/novel.116/jg29555/jg9023/jg20275/jg11952/jg38691/jg33679/jg31699/novel.85/jg2948/jg30160/jg3461/jg38233/jg4794 |

|    |            |                                  |        |          |             |             |                                                                                                                                                                                                                                                                                                                                                                                    |
|----|------------|----------------------------------|--------|----------|-------------|-------------|------------------------------------------------------------------------------------------------------------------------------------------------------------------------------------------------------------------------------------------------------------------------------------------------------------------------------------------------------------------------------------|
| MF | GO:0020037 | heme binding                     | 46/960 | 266/9398 | 0.000231002 | 0.012060609 | jg33801/novel.229/jg16891/jg2226/jg31038/novel.230/jg8118/novel.454/novel.737/jg33957/novel.261/jg22104/novel.116/jg29555/jg2167/jg8457/jg12924/jg9023/jg20275/jg8041/jg22392/jg39164/jg11952/jg2130/jg38691/jg26106/jg23482/jg33679/jg31699/jg4193/novel.455/novel.85/jg2517/jg33261/jg8043/jg4192/jg2948/jg30160/jg23117/novel.490/jg26107/jg26105/jg3461/jg38233/jg4794/jg31098 |
| MF | GO:0046906 | tetrapyrrole binding             | 46/960 | 267/9398 | 0.000252314 | 0.012060609 | jg33801/novel.229/jg16891/jg2226/jg31038/novel.230/jg8118/novel.454/novel.737/jg33957/novel.261/jg22104/novel.116/jg29555/jg2167/jg8457/jg12924/jg9023/jg20275/jg8041/jg22392/jg39164/jg11952/jg2130/jg38691/jg26106/jg23482/jg33679/jg31699/jg4193/novel.455/novel.85/jg2517/jg33261/jg8043/jg4192/jg2948/jg30160/jg23117/novel.490/jg26107/jg26105/jg3461/jg38233/jg4794/jg31098 |
| MF | GO:0004568 | chitinase activity               | 6/960  | 11/9398  | 0.000328814 | 0.013097748 | jg34074/jg29753/jg21946/jg12654/jg21947/jg21951                                                                                                                                                                                                                                                                                                                                    |
| CC | GO:0005618 | cell wall                        | 14/214 | 68/2194  | 0.004730234 | 0.212860525 | jg1307/jg38108/jg1316/jg3376/jg38109/jg3375/jg20406/jg23674/jg20409/jg20410/jg21321/jg31535/jg3374/jg33498                                                                                                                                                                                                                                                                         |
| CC | GO:0030312 | external encapsulating structure | 14/214 | 68/2194  | 0.004730234 | 0.212860525 | jg1307/jg38108/jg1316/jg3376/jg38109/jg3375/jg20406/jg23674/jg20409/jg20410/jg21321/jg31535/jg3374/jg33498                                                                                                                                                                                                                                                                         |
| CC | GO:0071944 | cell periphery                   | 17/214 | 110/2194 | 0.034293692 | 0.999763843 | jg1307/jg12433/jg9686/jg38108/jg30412/jg1316/jg3376/jg38109/jg3375/jg20406/jg23674/jg20409/jg20410/jg21321/jg31535/jg3374/jg33498                                                                                                                                                                                                                                                  |
