# Supplementary figures and images for: Integration of GWAS and RNA-Seq Analysis to Identify SNPs and Candidate Genes Associated with Alkali Stress Tolerance at the Germination Stage in Mung Bean
Source: MDPI journal article supplement (doi:10.3390/genes14061294), 2023-06-19

**Figure S2.** LD decay analysis of the 11 mungbean groups.

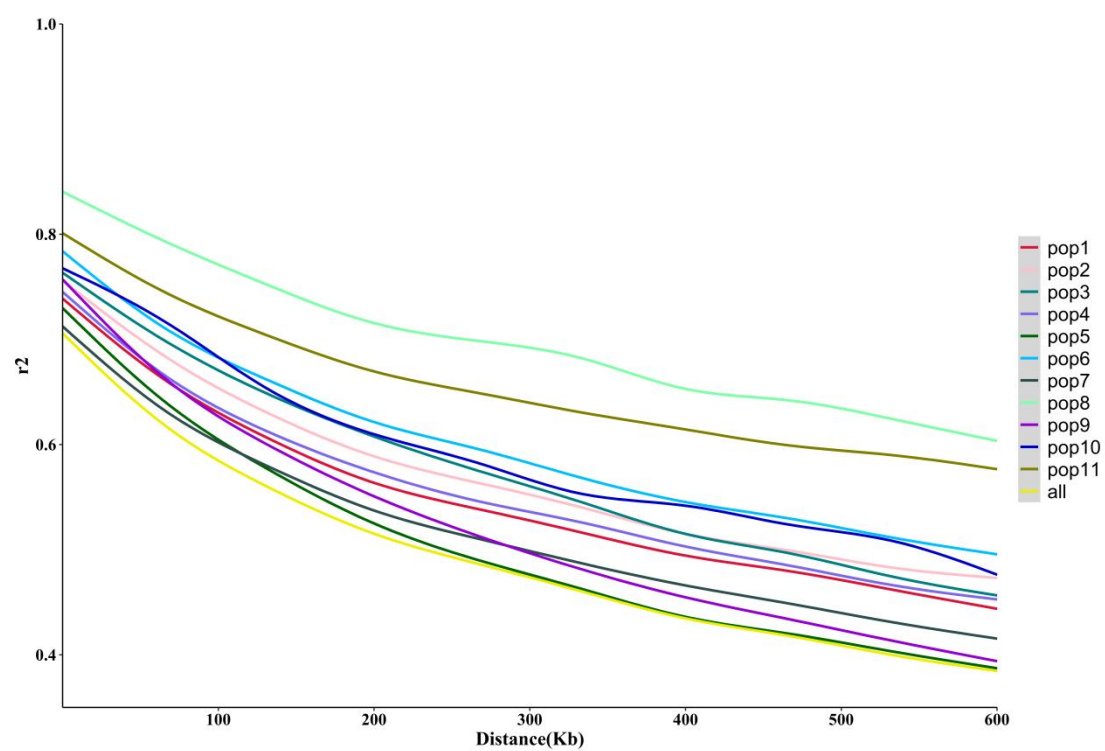

Supplement: s1 [file s1]

**Figure S1.** Estimated population structure of the 277 mungbean accessions with values of  $K = 11$ .

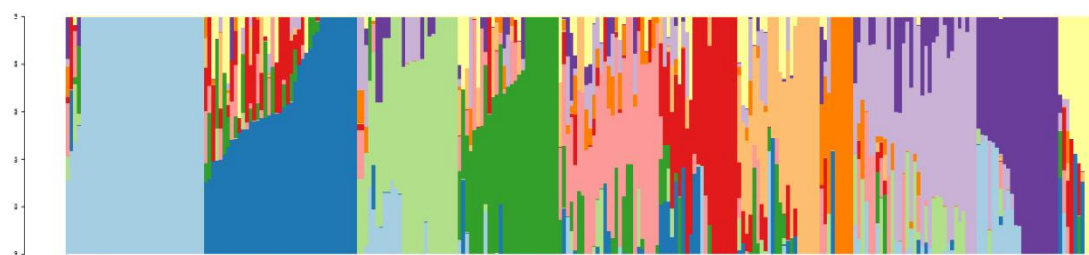

Supplement: s1 [file s1]

**Figure S3.** Gene Ontology (GO) enrichment analysis of 312 alkali-response genes detected in GWAS.

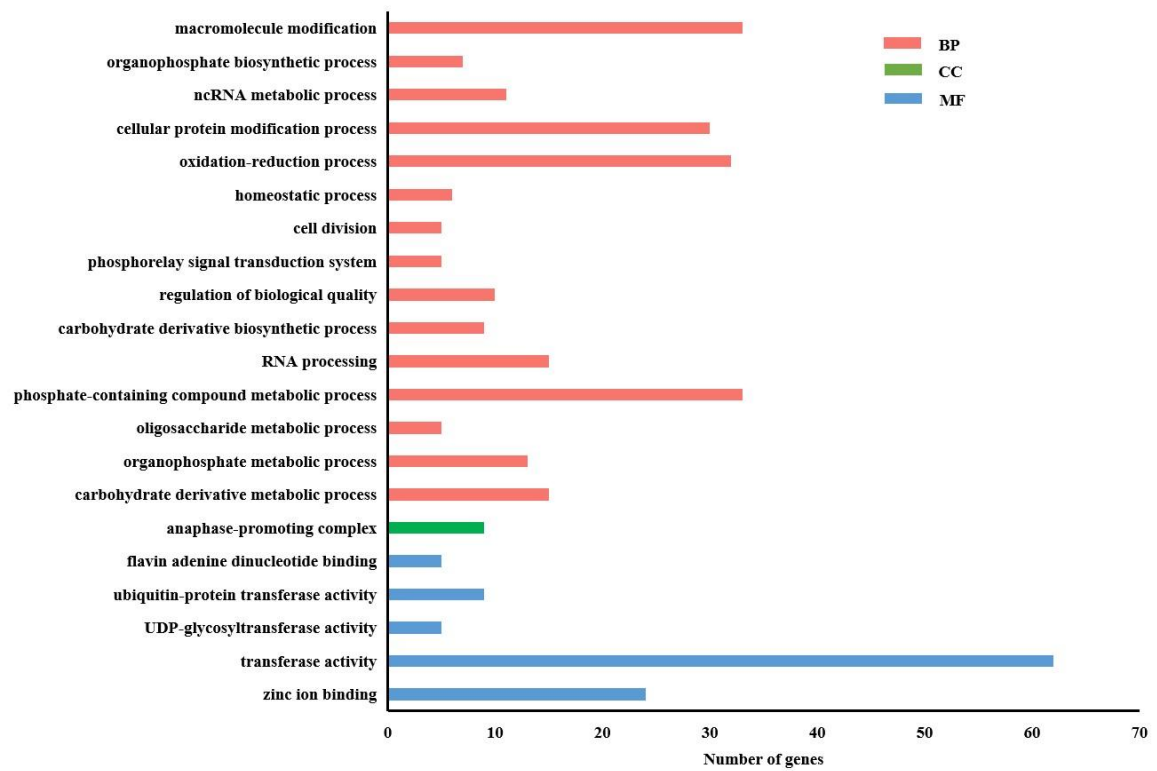

Supplement: s1 [file s1]

**Figure S4.** Validation of the 14 genes in transcriptome sequencing with qRT-PCR.

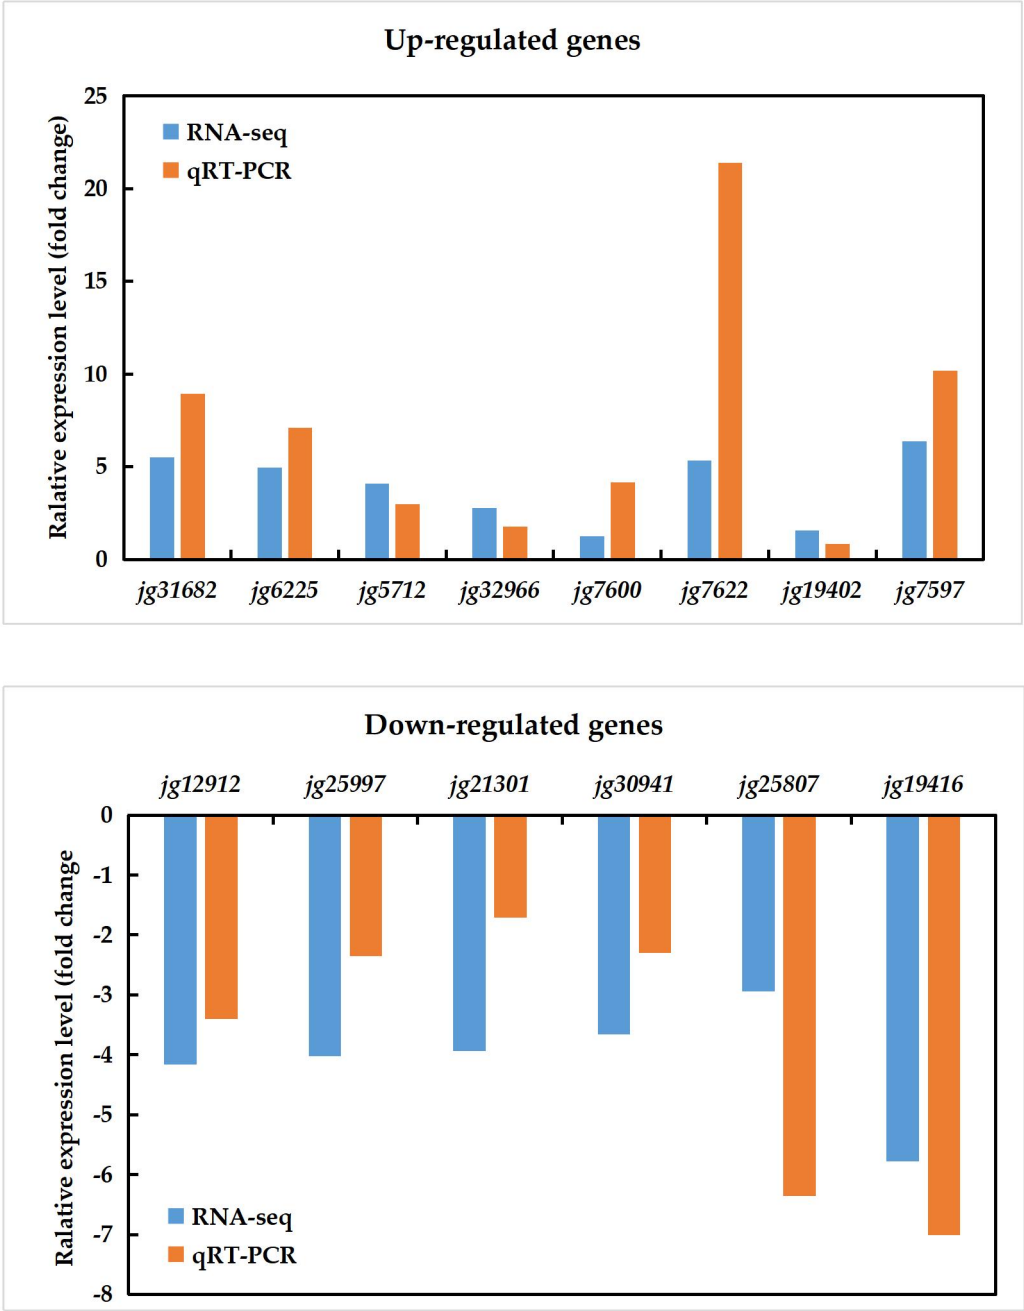

Supplement: s1 [file s1]
